# Supplementary material for: Transplantation of committed pre-adipocytes from brown adipose tissue improves whole-body glucose homeostasis
Source: PubMed Central journal article supplement — iScience. 2024 Jan 17;27(2):108927. doi: 10.1016/j.isci.2024.108927 (PMC10847743; doi:10.1016/j.isci.2024.108927), 2024-01-17

# Data S1

Original western  
blot images  
related to Figures  
2, 5, 7 and  
Figures S2, 5, 6, 7,  
8, 9 and 11.

Figure 2A pAKT

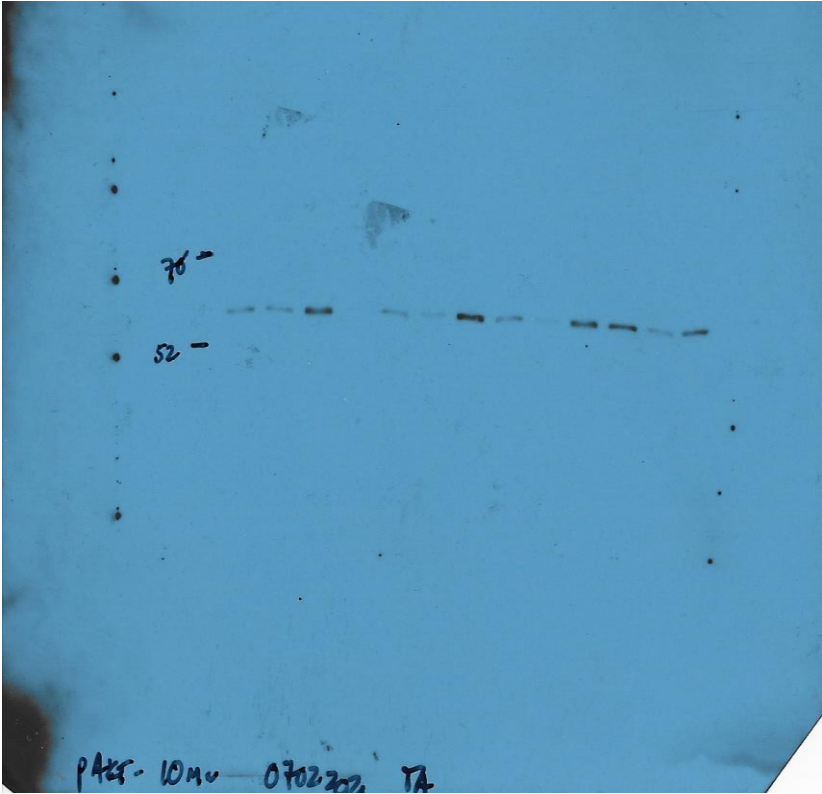

Figure 2A AKT

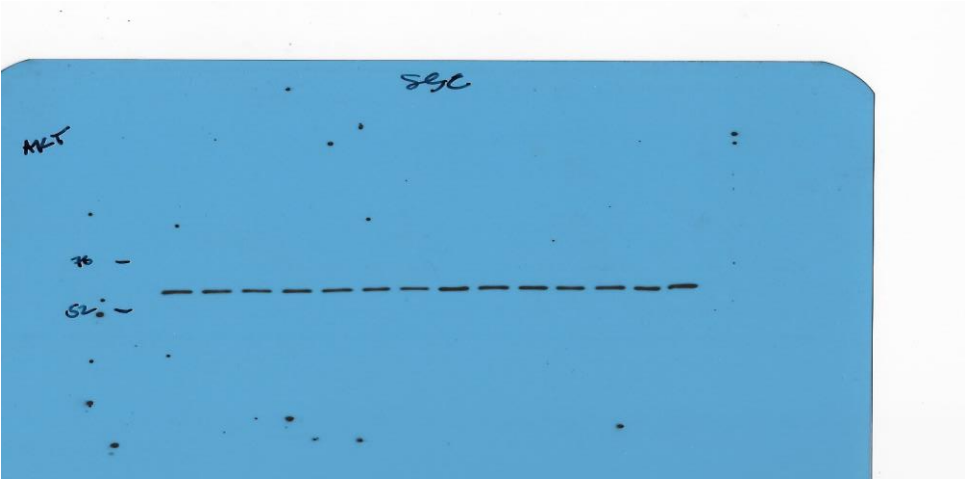

Figure 2B pAKT

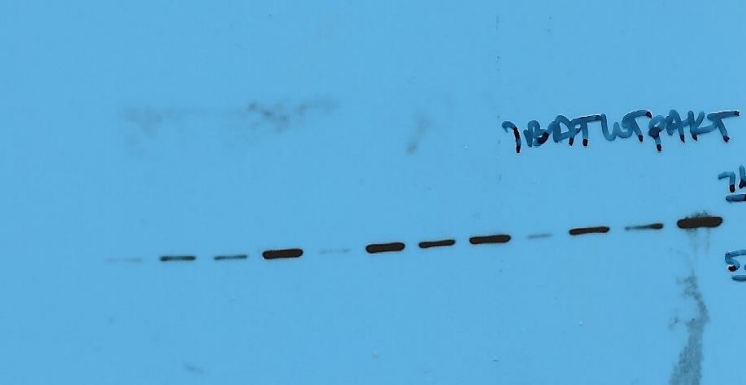

Figure 2B AKT

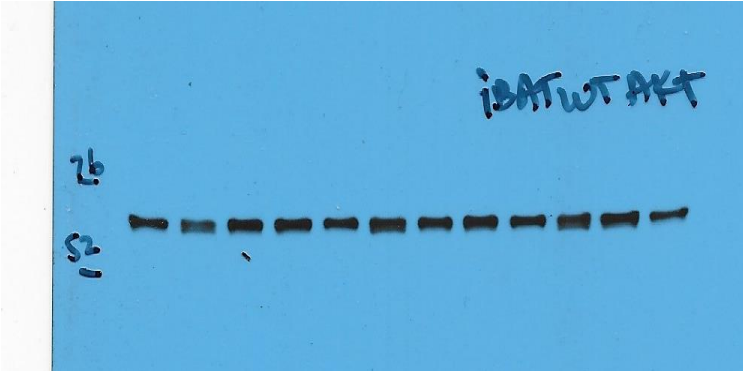

Figure 2C pAKT

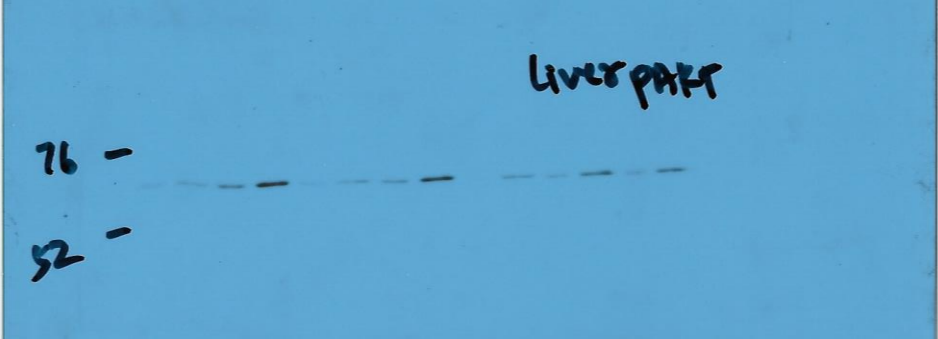

Figure 2C AKT

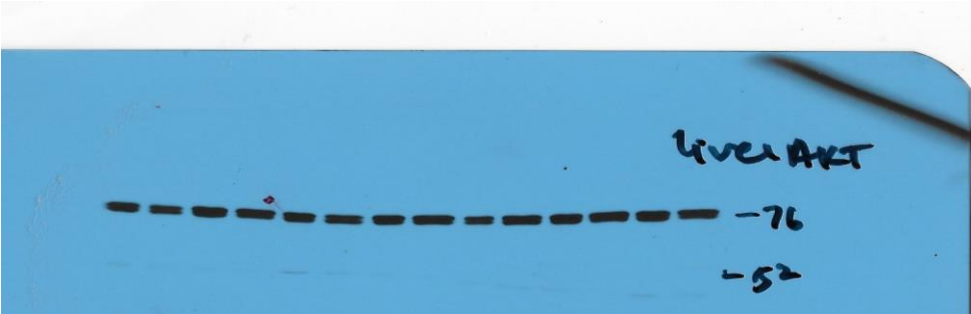

# Figure 5A pAKT

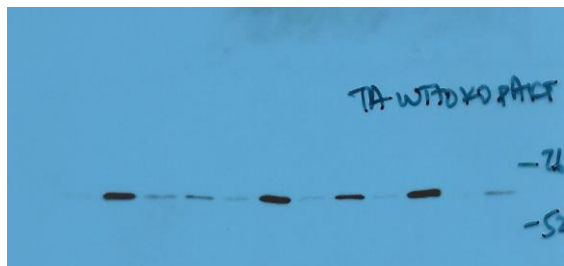

# Figure 5A AKT

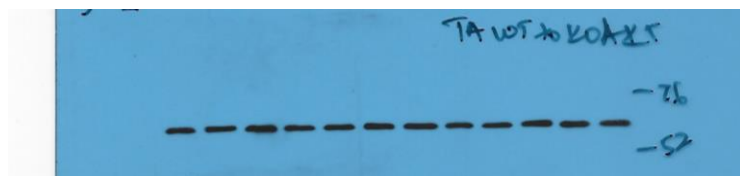

Figure 5B pAKT

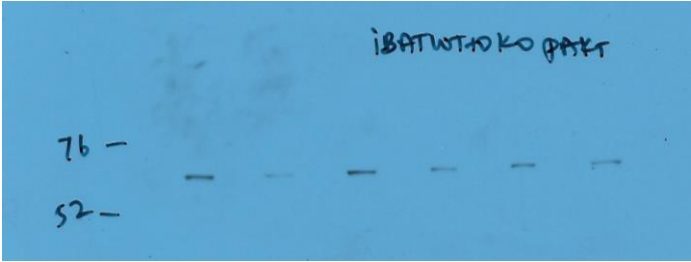

Figure 5B AKT

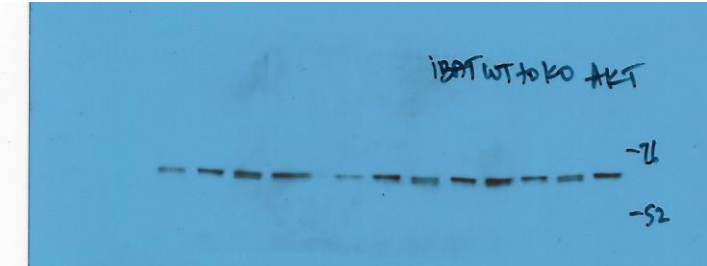

Figure 5C pAKT

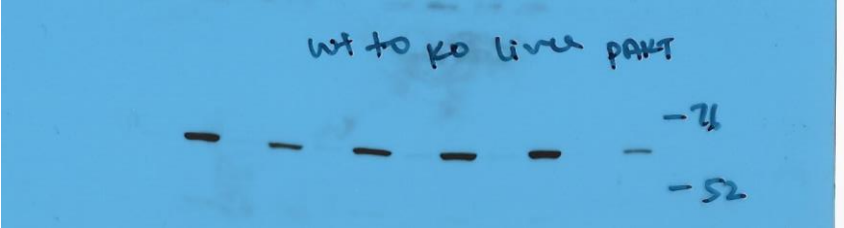

Figure 5C AKT

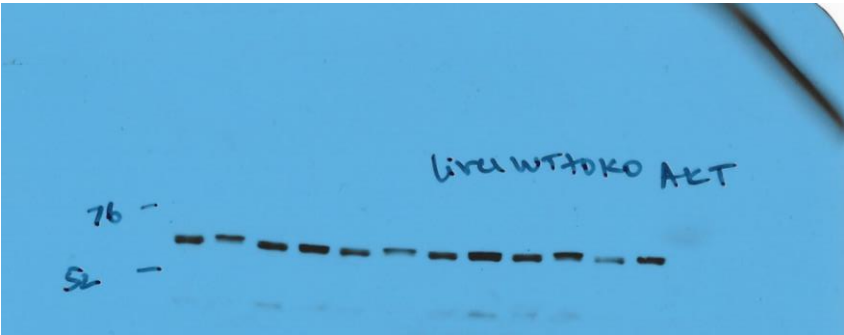

Figure 7A pAKT

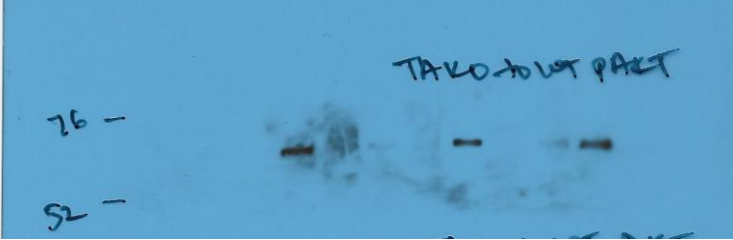

Figure 7A AKT

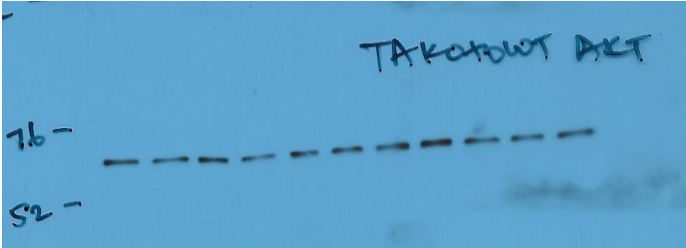



Figure 7B pAKT

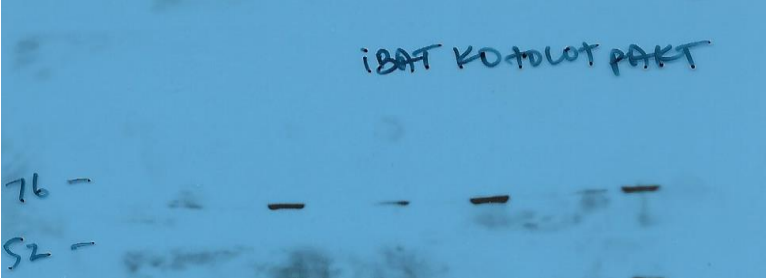

Figure 7B AKT

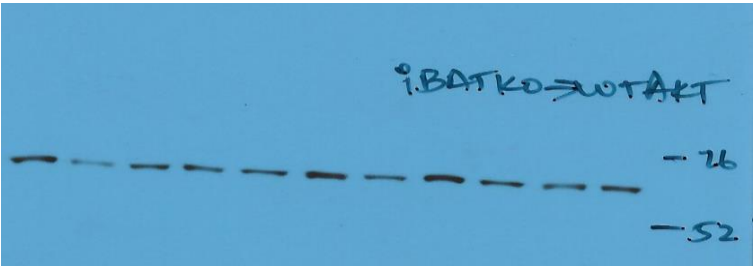

Figure 7C pAKT

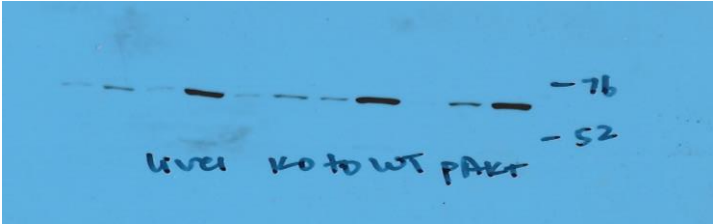

Figure 7C AKT

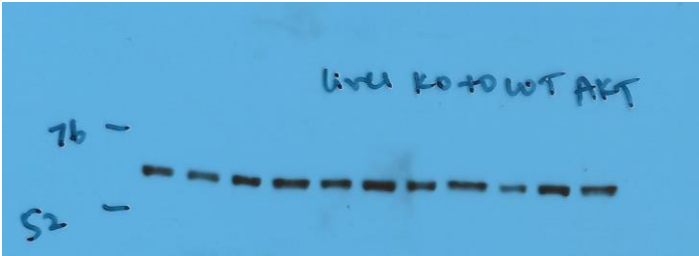

# Figure 7D pAKT

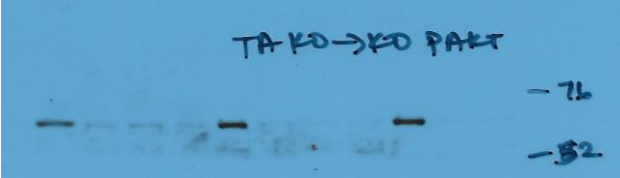

# Figure 7D AKT

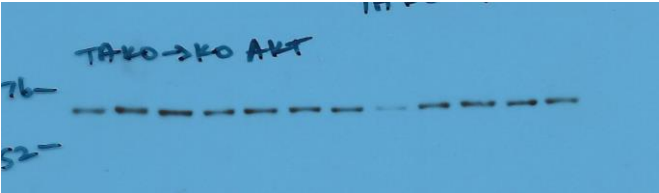

Figure 7E pAKT

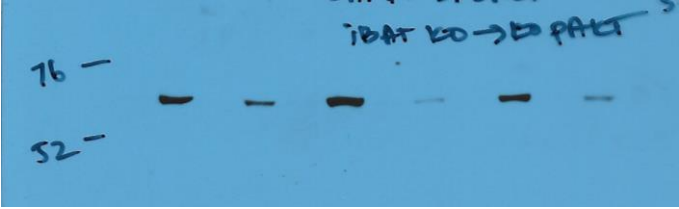

Figure 7F AKT

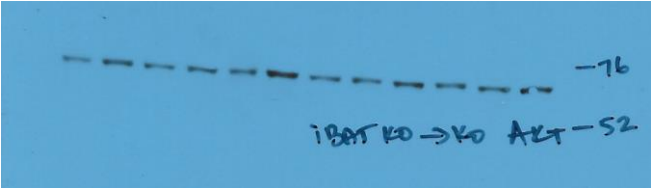

Figure 7F pAKT

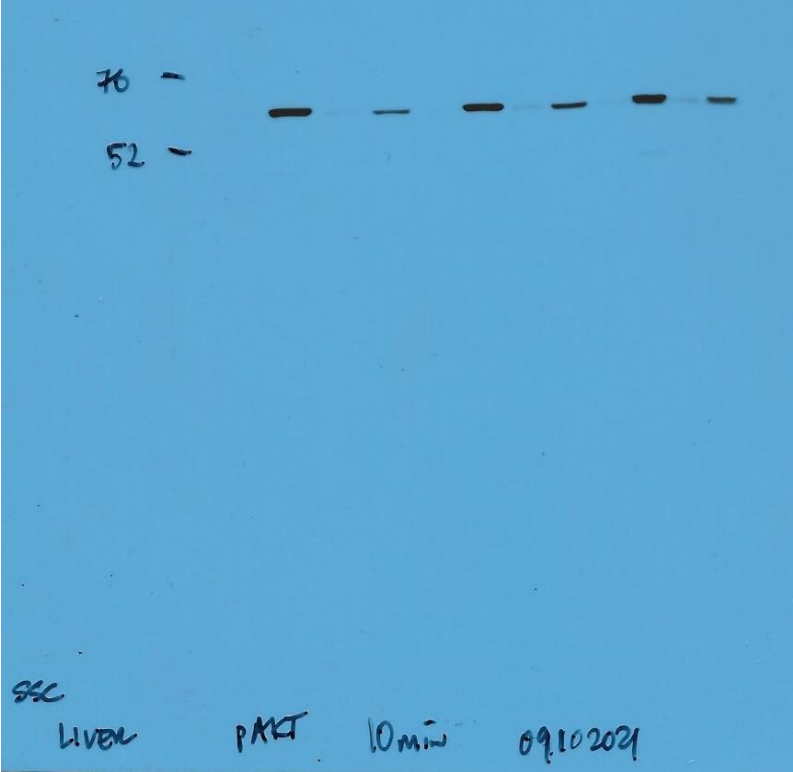

Figure 7F AKT

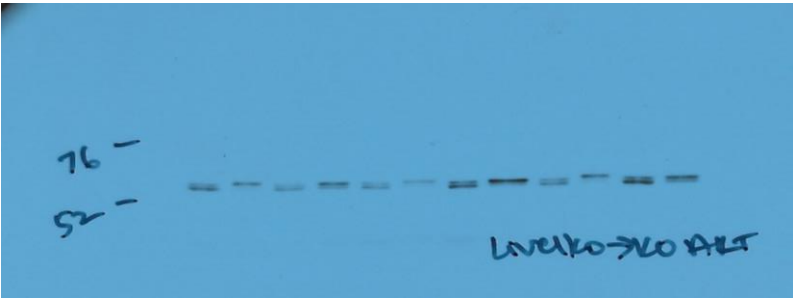

Figure S2C pAKT

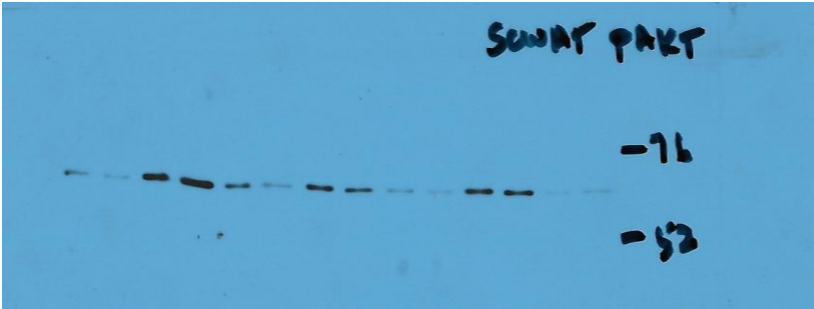

Figure S2C AKT

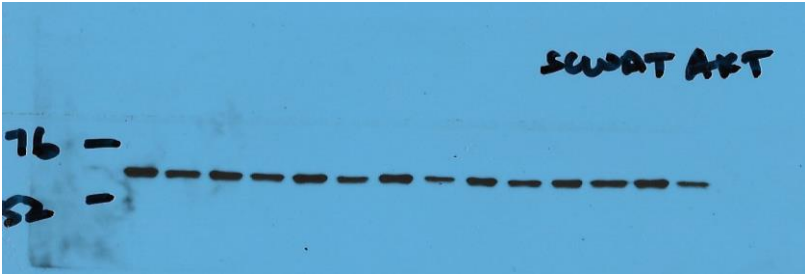

Figure S2C GAPDH

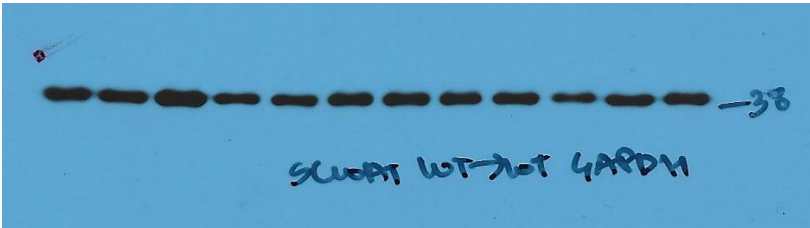

Figure S2D pAMPK

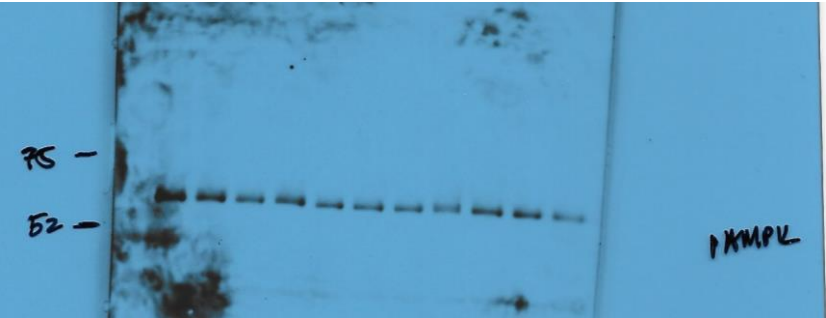

Figure S2D AMPK

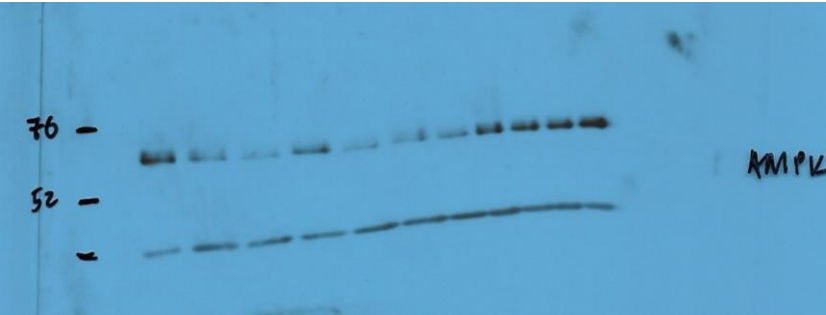

Figure S2D GAPDH

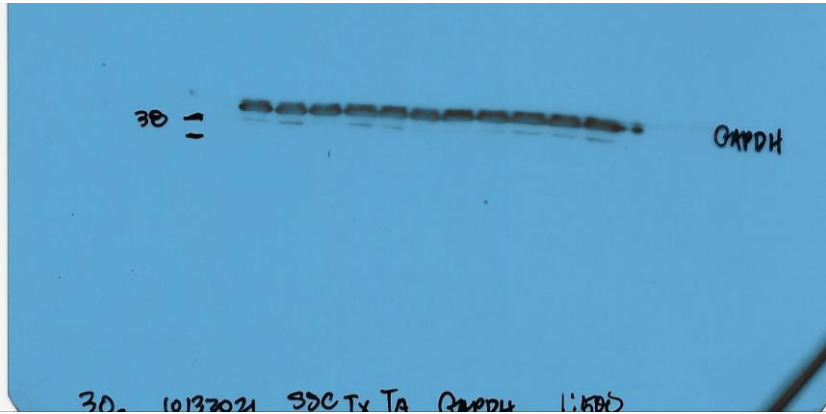

Figure S2E pAMPK

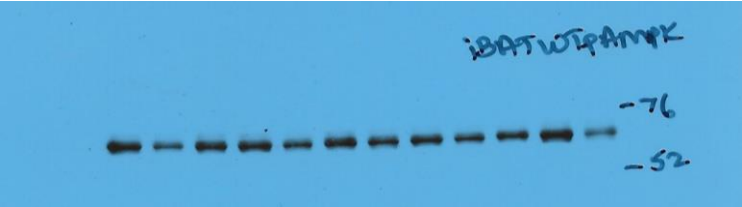

Figure S2E AMPK

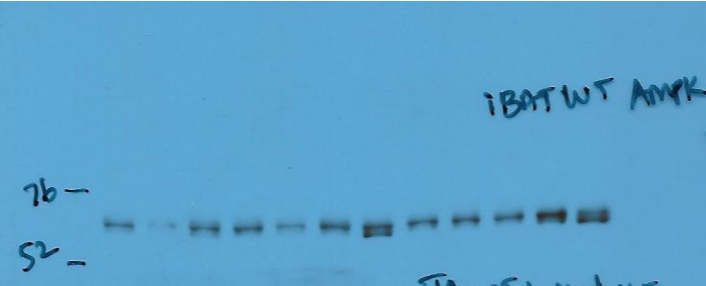

Figure S2E GAPDH

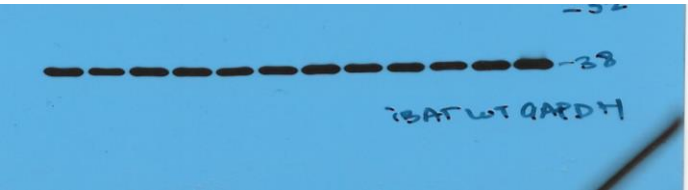



Figure S2F pAMPK

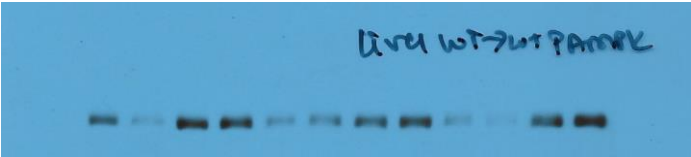

Figure S2F AMPK

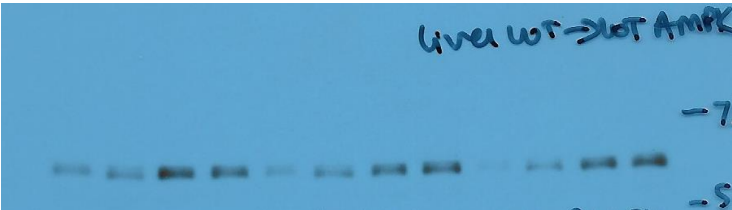

Figure S2F GAPDH

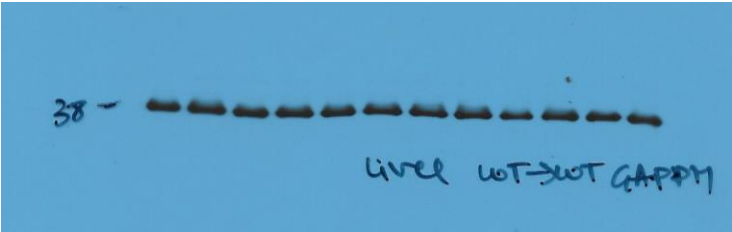

# Figure S5A MUP1

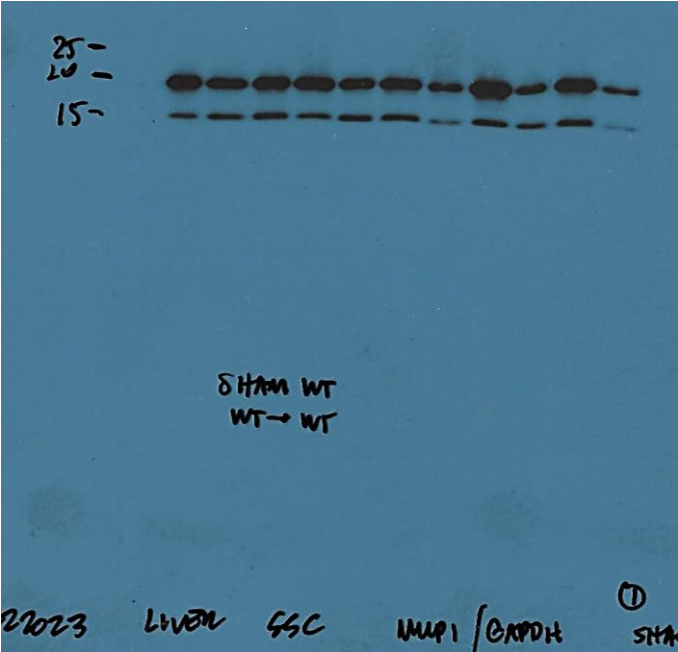

# Figure S5A GAPDH

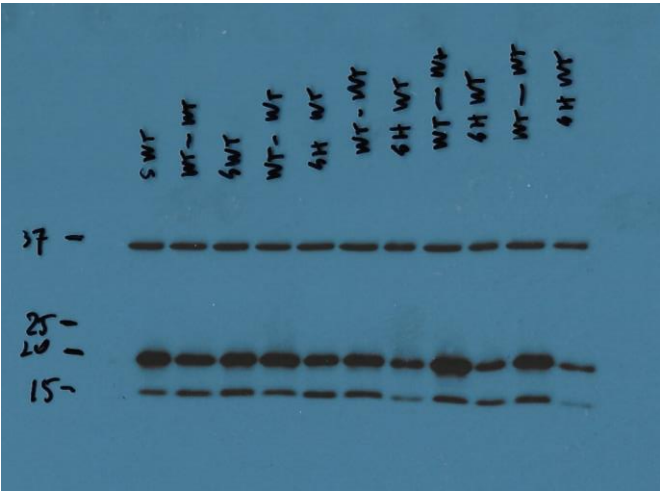

Figure S5B MUP11, GAPDH

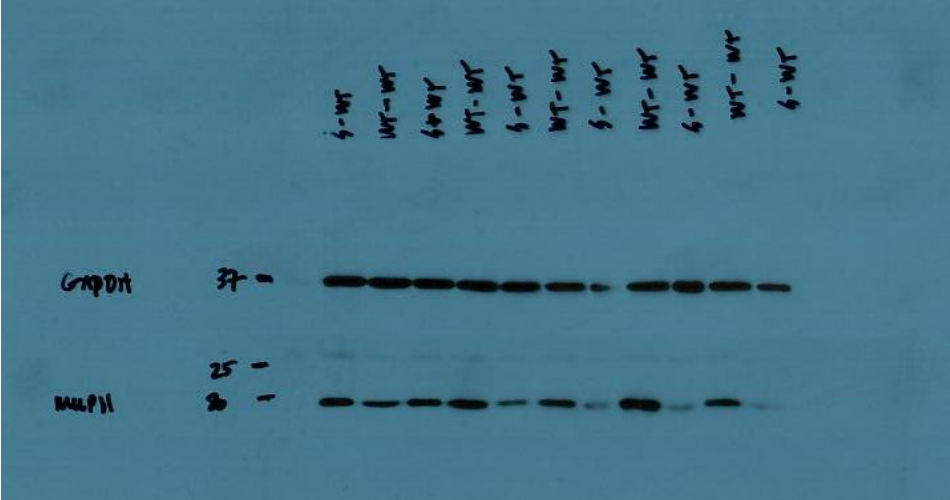

Figure S5C MUP12, GAPDH

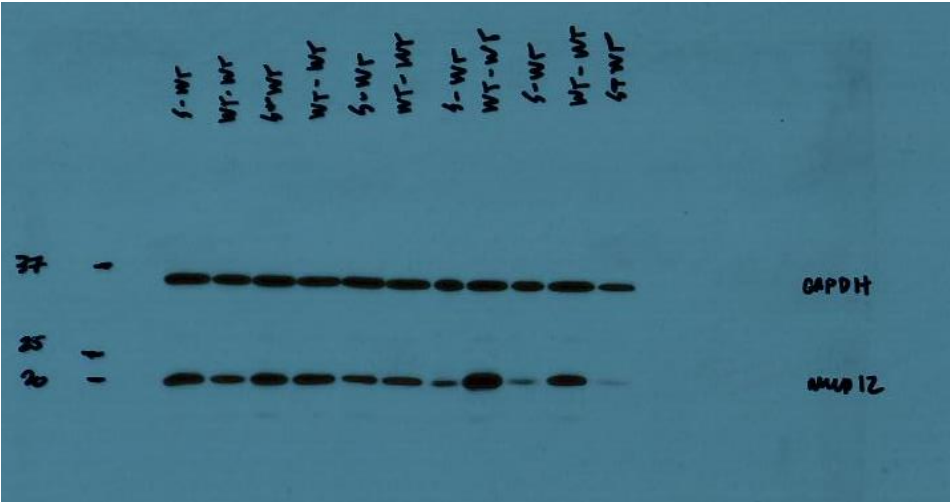

Figure S6A pAKT

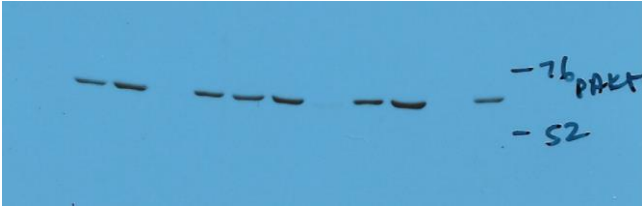

Figure S6A AKT

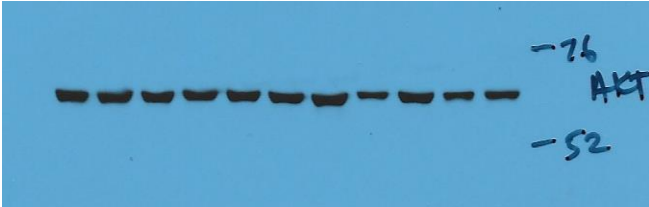

Figure S6B pAMPK

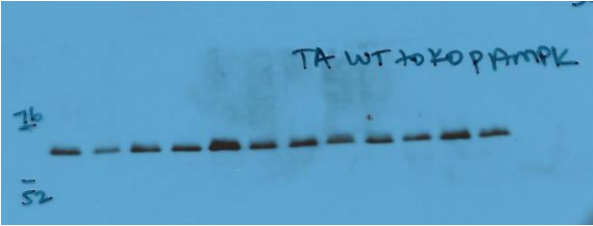

Figure S6B AMPK

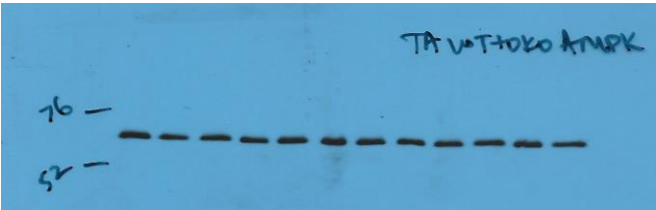

Figure S6B GAPDH

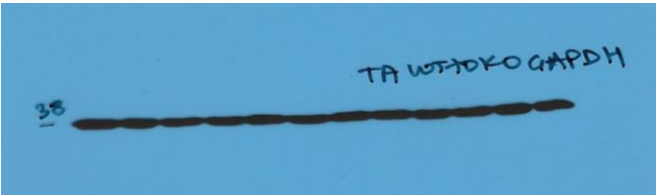

Figure S6C pAMPK

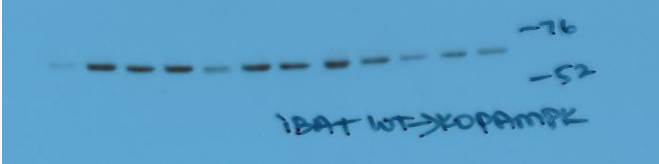

Figure S6C AMPK

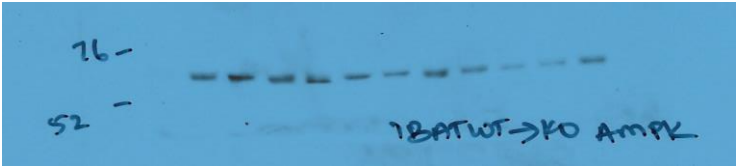

Figure S6C GAPDH

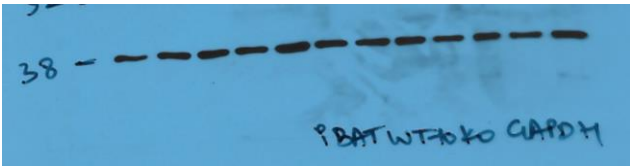

# Figure S6D pAMPK

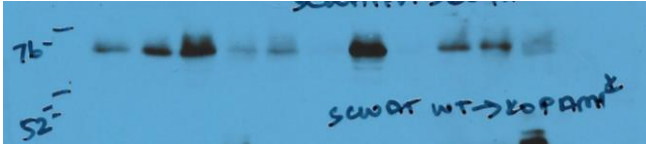

# Figure S6D AMPK

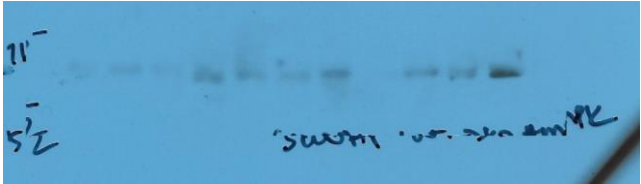

# Figure S6D GAPDH

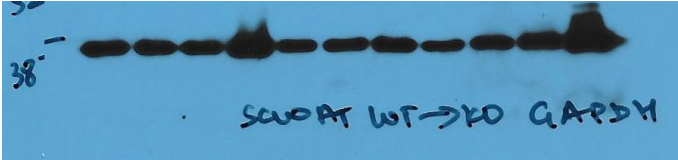

Figure S6E pAMPK

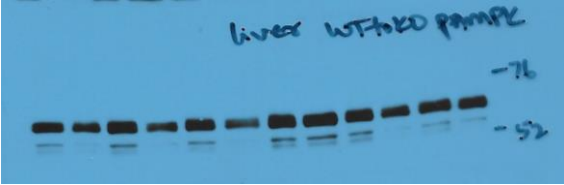

Figure S6E AMPK

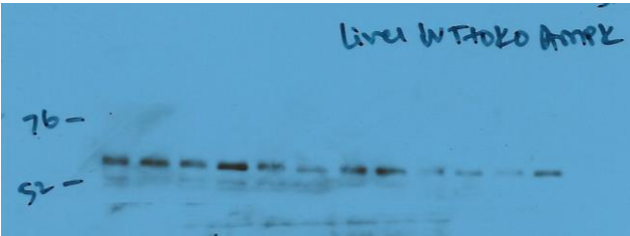

Figure S6E GAPDH

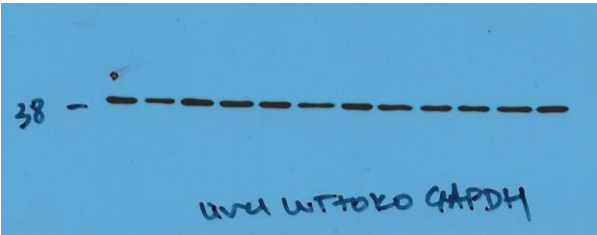



# Figure S7C MUP1, GAPDH

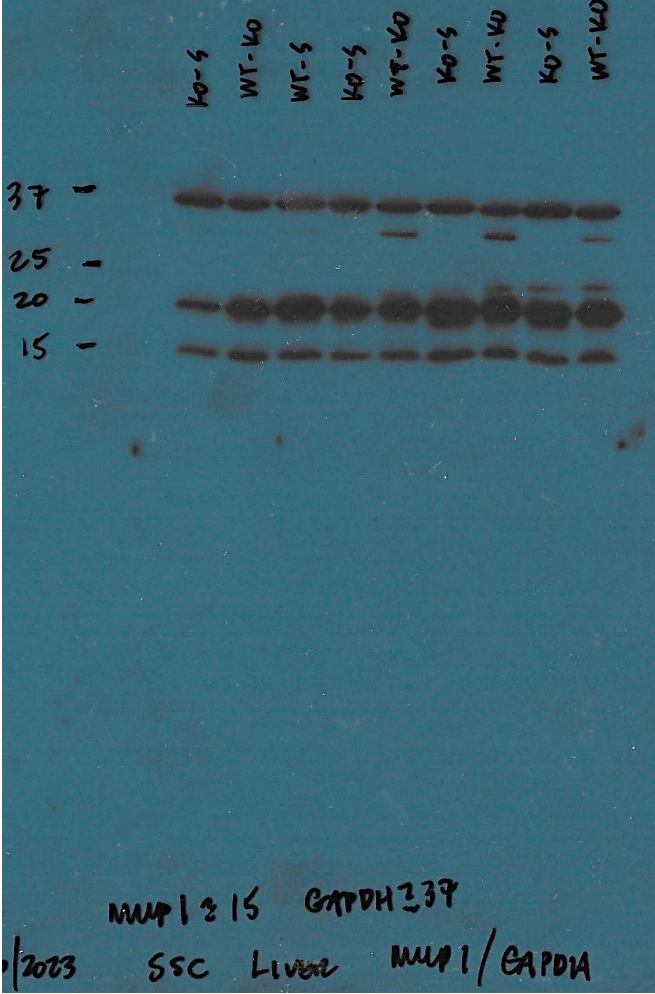

# Figure S7D MUP11, GAPDH

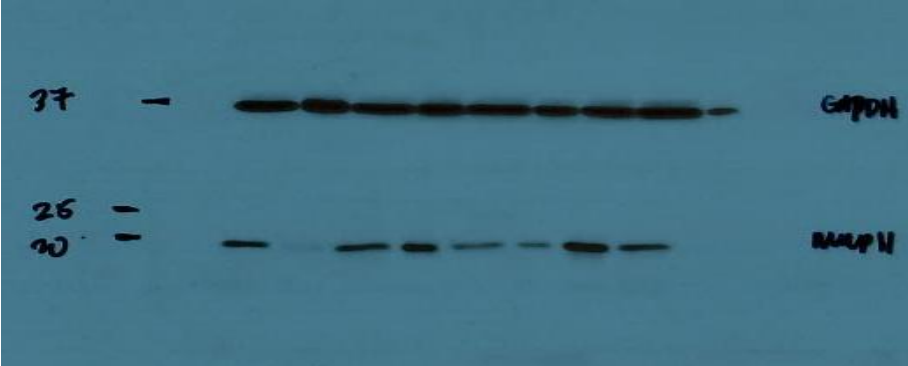

# Figure S7E MUP12, GAPDH

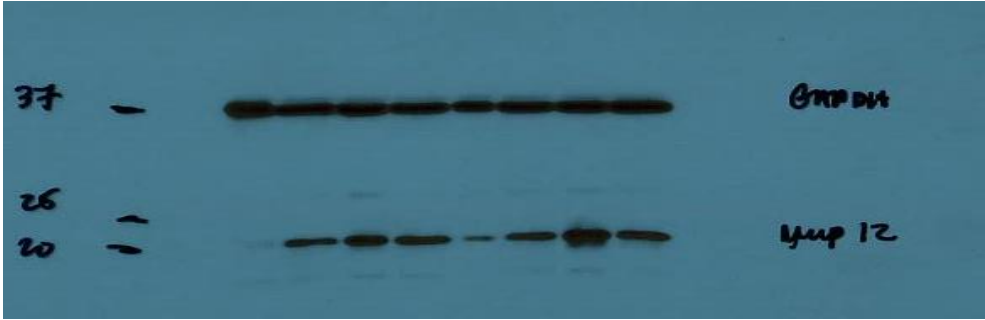

Figure S8A pAKT

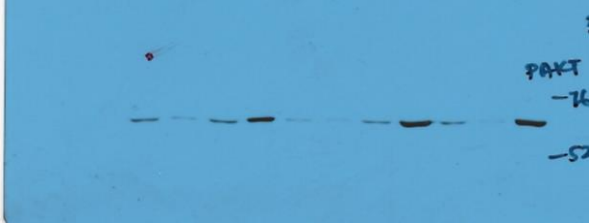

Figure S8A AKT

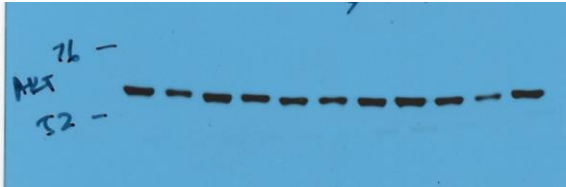

Figure S8B pAMPK

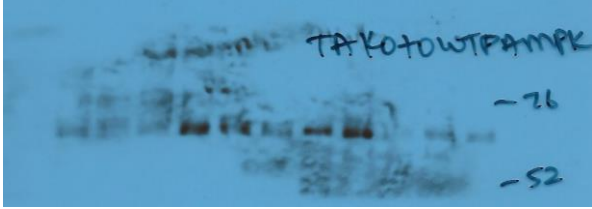

Figure S8B AMPK

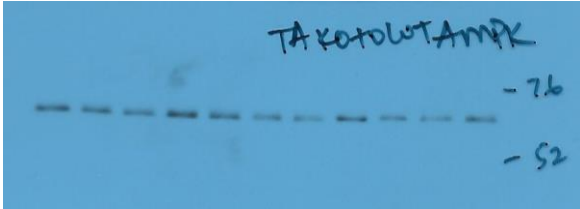

Figure S8B GAPDH

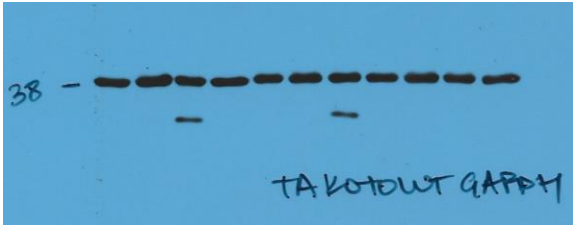

Figure S8C pAMPK

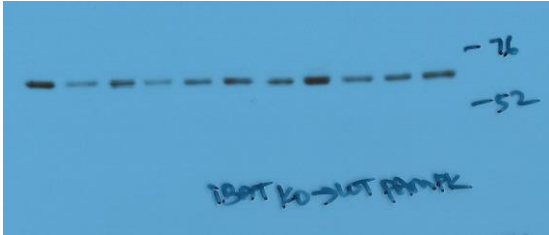

Figure S8C AMPK

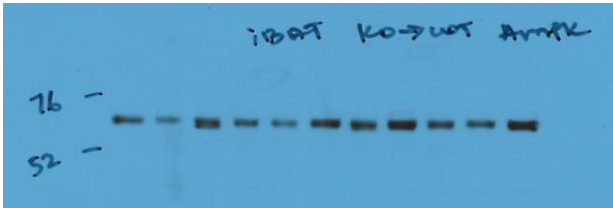

Figure S8C GAPDH

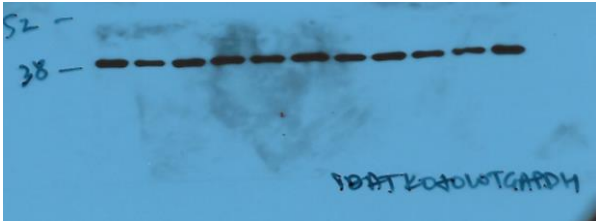

Figure S8D pAMPK

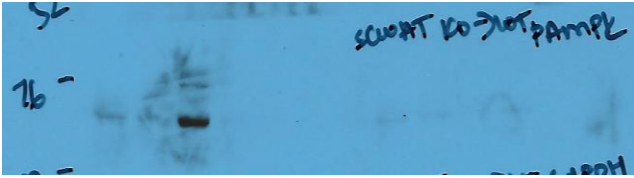

Figure S8D AMPK

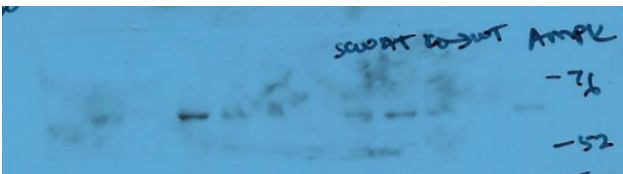

Figure S8D GAPDH

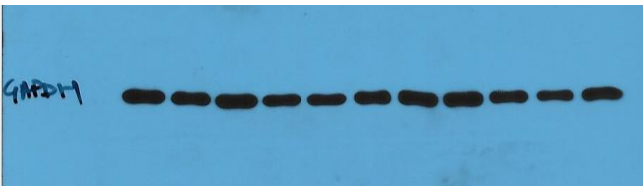

Figure S8E pAMPK

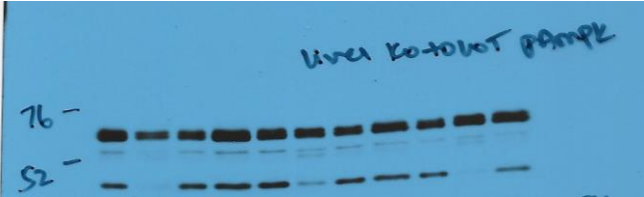

Figure S8E AMPK

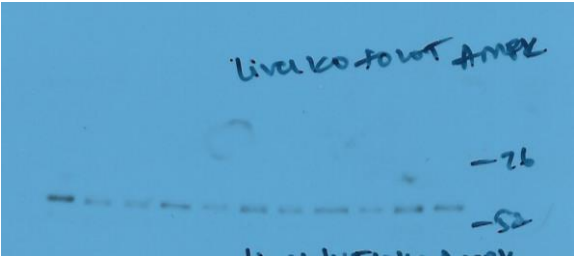

Figure S8E GAPDH

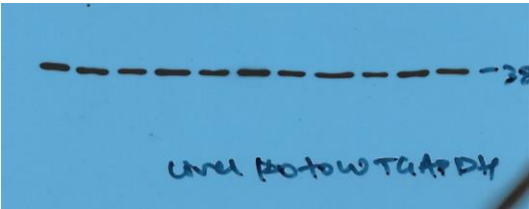



# Figure S9A pAKT

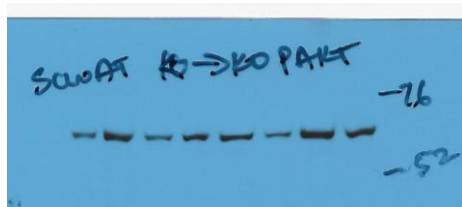

# Figure S9A AKT

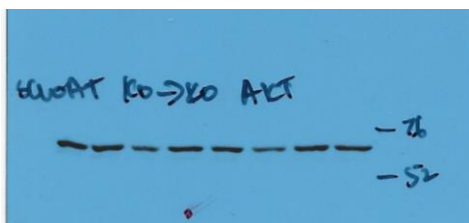

Figure S9B pAMPK

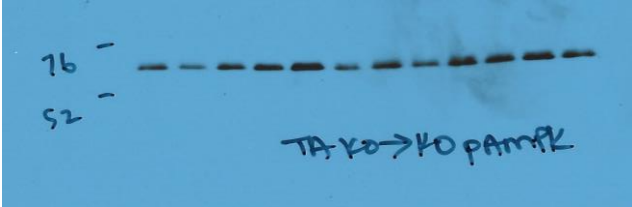

Figure S9B AMPK

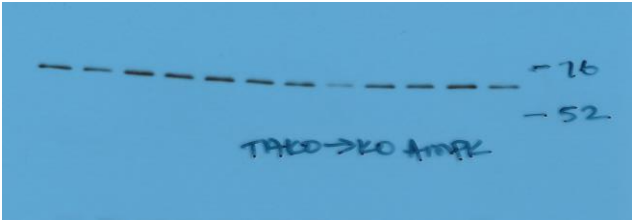

Figure S9B GAPDH

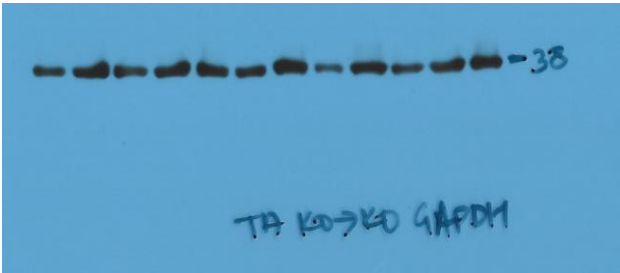

Figure S9C pAMPK

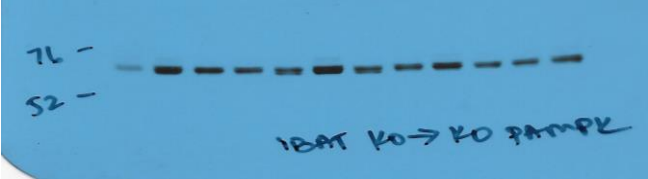

Figure S9C AMPK

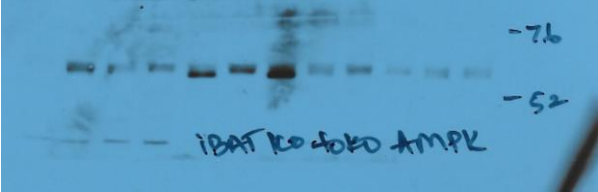

Figure S9C GAPDH

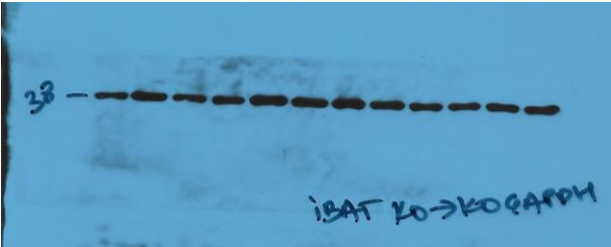

Figure S9D pAMPK

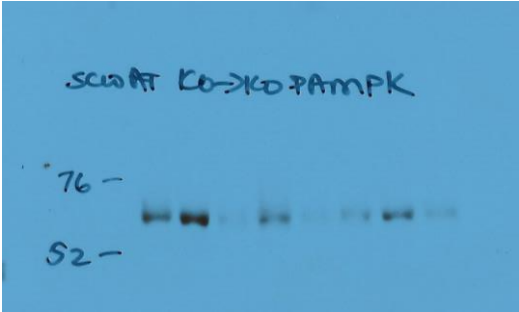

Figure S9D AMPK

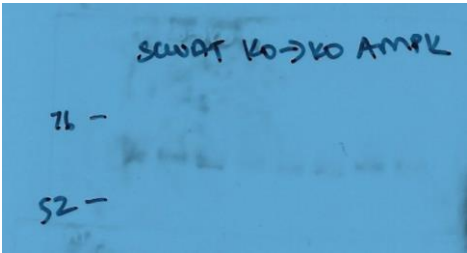

Figure S9D GAPDH

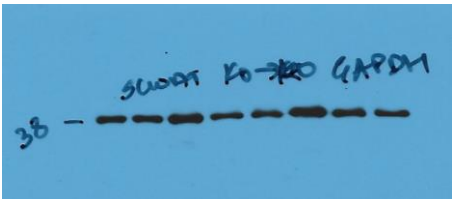

Figure S9E pAMPK

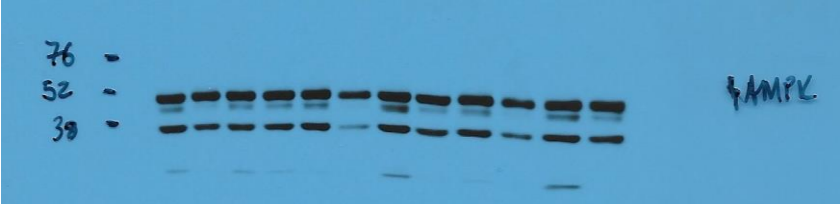

Figure S9E AMPK

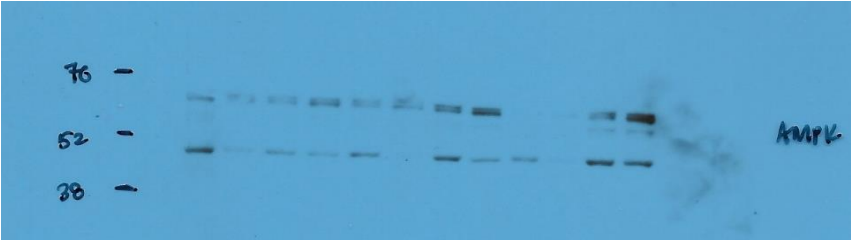

Figure S9E GAPDH

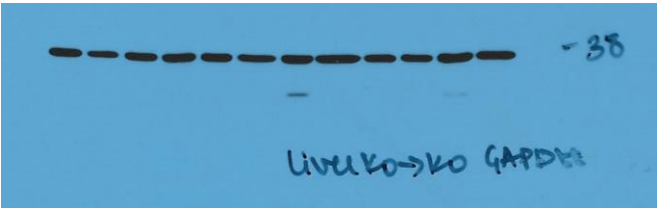



Figure S11C MUP12, GAPDH

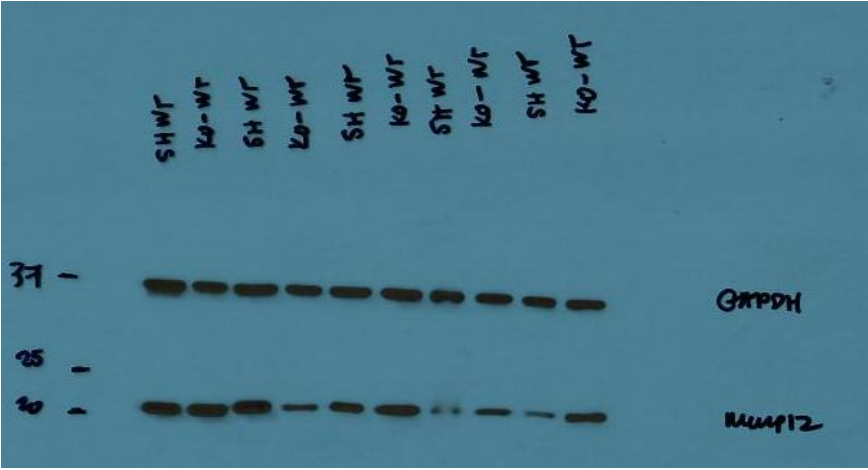

Figure S11D MUP1, GAPDH

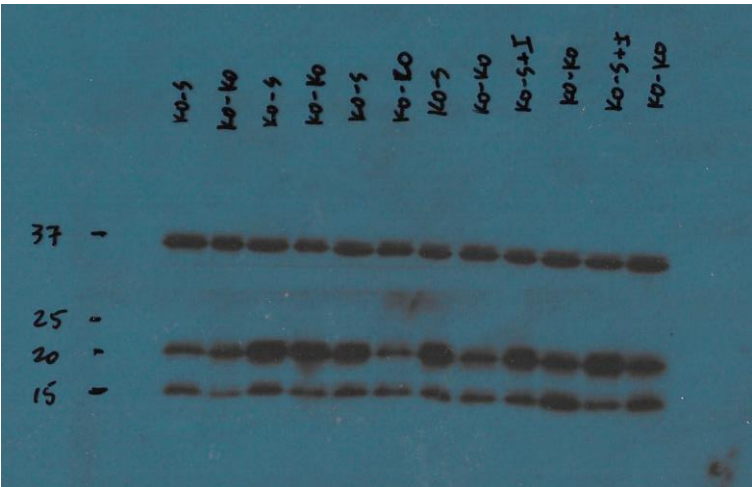

Figure S11E MUP11, GAPDH

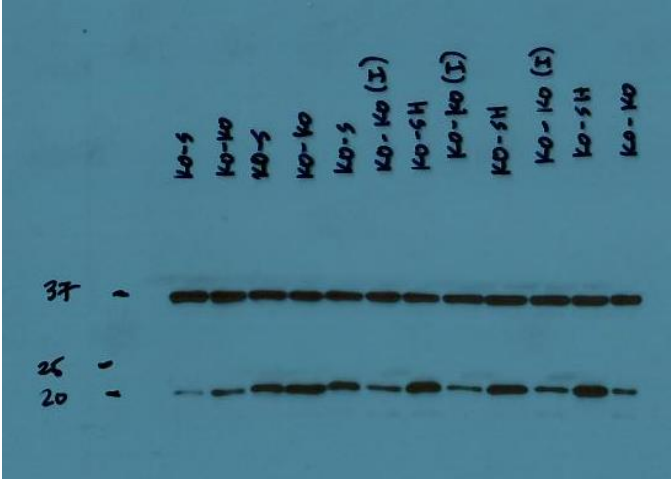

Figure S11F MUP12, GAPDH

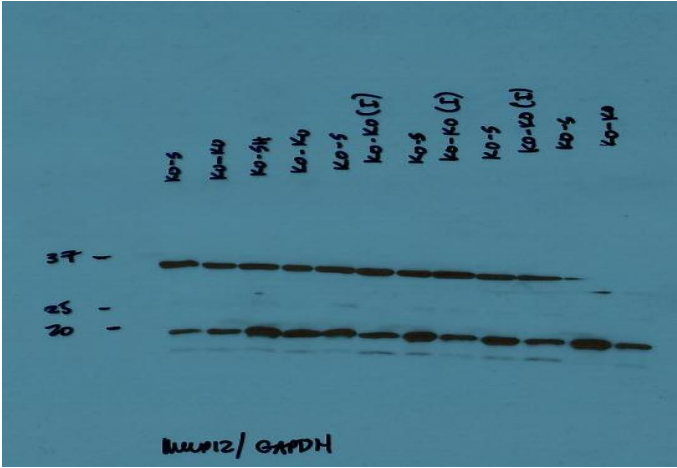

Supplement: mmc2.pdf [file mmc2.pdf]
