# Supplementary material for: Transplantation of committed pre-adipocytes from brown adipose tissue improves whole-body glucose homeostasis
Source: PubMed Central journal article supplement — iScience. 2024 Jan 17;27(2):108927. doi: 10.1016/j.isci.2024.108927 (PMC10847743; doi:10.1016/j.isci.2024.108927), 2024-01-17
Supplement: mmc1.pdf [file mmc1.pdf]

**Supplemental information**

**Transplantation of committed  
pre-adipocytes from brown adipose tissue improves  
whole-body glucose homeostasis**

**Revati S. Dewal, Felix T. Yang, Lisa A. Baer, Pablo Vidal, Diego Hernandez-Saavedra, Nikolai P. Seculov, Adhideb Ghosh, Falko Noé, Olivia Togliatti, Lexis Hughes, Megan K. DeBari, Michael D. West, Richard Soroko, Hal Sternberg, Nafees N. Malik, Estella Puchulu-Campanella, Huabao Wang, Pearlly Yan, Christian Wolfrum, Rosalyn D. Abbott, and Kristin I. Stanford**

## Supplemental Figures

### Figure S1: Adipogenic differentiation of pre-adipocytes from BAT SVF and tracing of transplanted committed pre-adipocytes. Related to Figures 1-7

(A) 40x magnification of pre-adipocytes from BAT SVF showing the cells over days 0, 3 and 8 of differentiation. (B) Expression of genes involved in adipogenesis in pre-adipocytes from BAT SVF over days 0, 1, 3, 5, 7 and 8 of differentiation (n=4-16 per group; \*p<0.05, \*\*p<0.01, \*\*\*p<0.001, \*\*\*\*p<0.001 vs Day 0 of differentiation) (C) IVIS Bioluminescent imaging of 1 million committed pre-adipocytes from Luciferase transgenic mice (in 2mmx4mm cylindrical silk scaffolds) using 50 $\mu$ L of Luciferin; 3 min exposures; open filter; 1-week and 3-weeks post-transplant. (D, E) Representative images from IVIS Bioluminescent imaging of C57BL/6 Male mice transplanted with 1 million committed pre-adipocytes from Luciferase transgenic mice (Committed pre-adipocytes) or empty scaffolds (Sham) using 100 $\mu$ L of Luciferin; 3 min exposures; open filter). (F) Scaffold location *in vitro* 4 weeks post-transplant. (G) 40X magnification of committed pre-adipocytes from extracted scaffold, 4 weeks post-transplant. (H) IVIS Bioluminescent imaging of cells isolated from scaffolds 4 weeks post-transplant and control cells isolated from scWAT of a Luciferase Tg mouse; using 50 $\mu$ L of Luciferin; 3 min exposures; open filter. All data are represented as mean  $\pm$  SEM.

# Figure S1

A

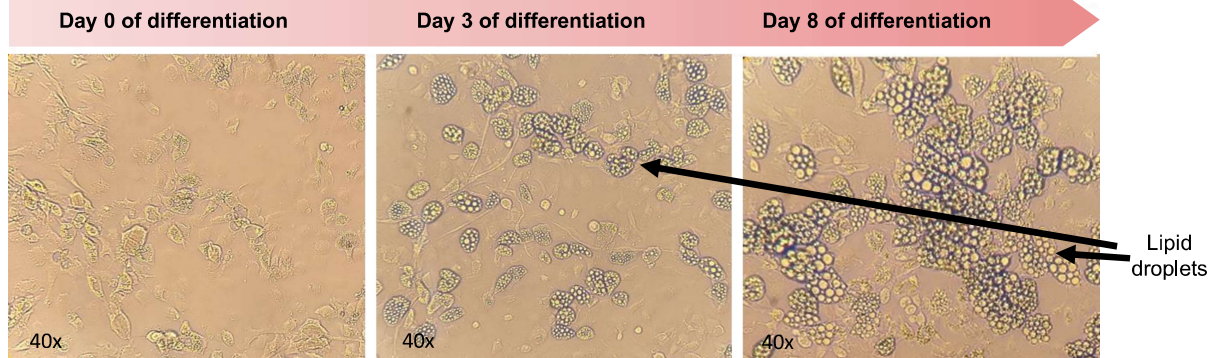

B

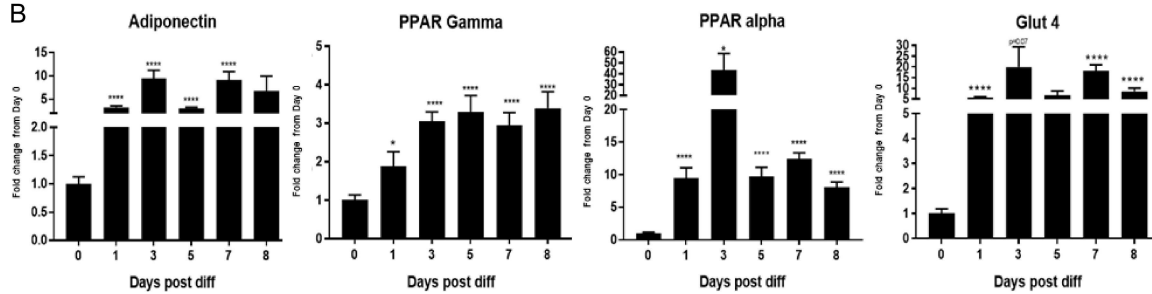

C

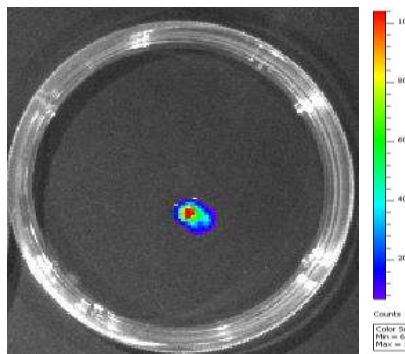

D

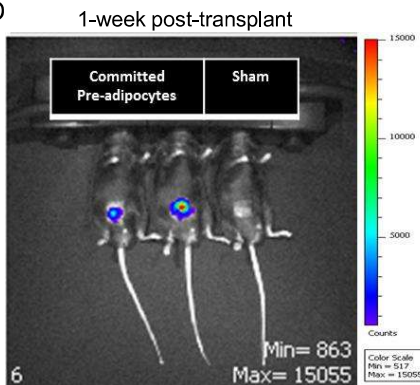

E

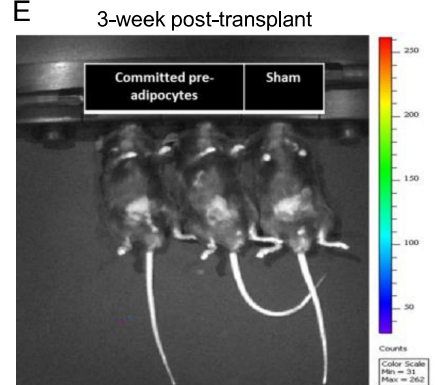

F

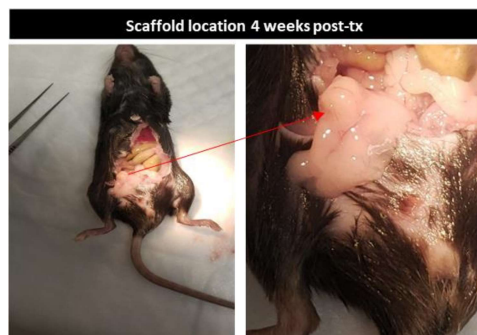

G

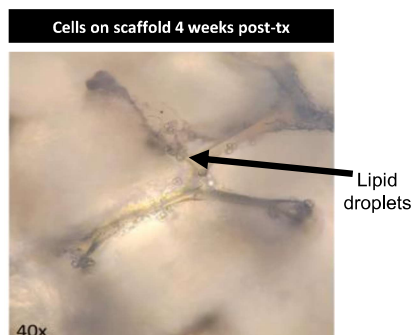

H

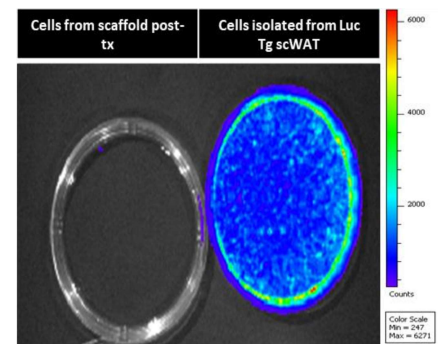

**Figure S2: Transplantation of WT committed pre-adipocytes affects metabolic health and AKT signaling in WT recipients. Related to Figures 1-2.**

(A) Weekly body weight (n=11-24 per group; \*p<0.05 vs Sham-WT at 12 weeks post-transplant; two-way-ANOVA). (B) GTT AUC 4- and 8-weeks post-transplant in (n=5-46 per group; \*p<0.05 vs Sham-WT at 4 weeks post-transplant, \*\*p<0.01 vs Sham-WT at 8 weeks post-transplant, @@@p<0.001 vs 4 weeks post-transplant; two-tailed t-test). (C) Western blotting protein expression for pAKT/AKT and blots for pAKT and AKT in scWAT. (D-F) Western blotting protein expression for pAMPK/AMPK and blots for pAMPK, AMPK and GAPDH in TA (D), iBAT (E), and Liver (F) (n=3-5 per group; insulin-stimulated conditions depicted using 'i'; \*p<0.05, \*\*p<0.01 as described [\*= insulin effect; #= group effect]; two-tailed t-test). All data are represented as mean ± SEM.

Figure S2

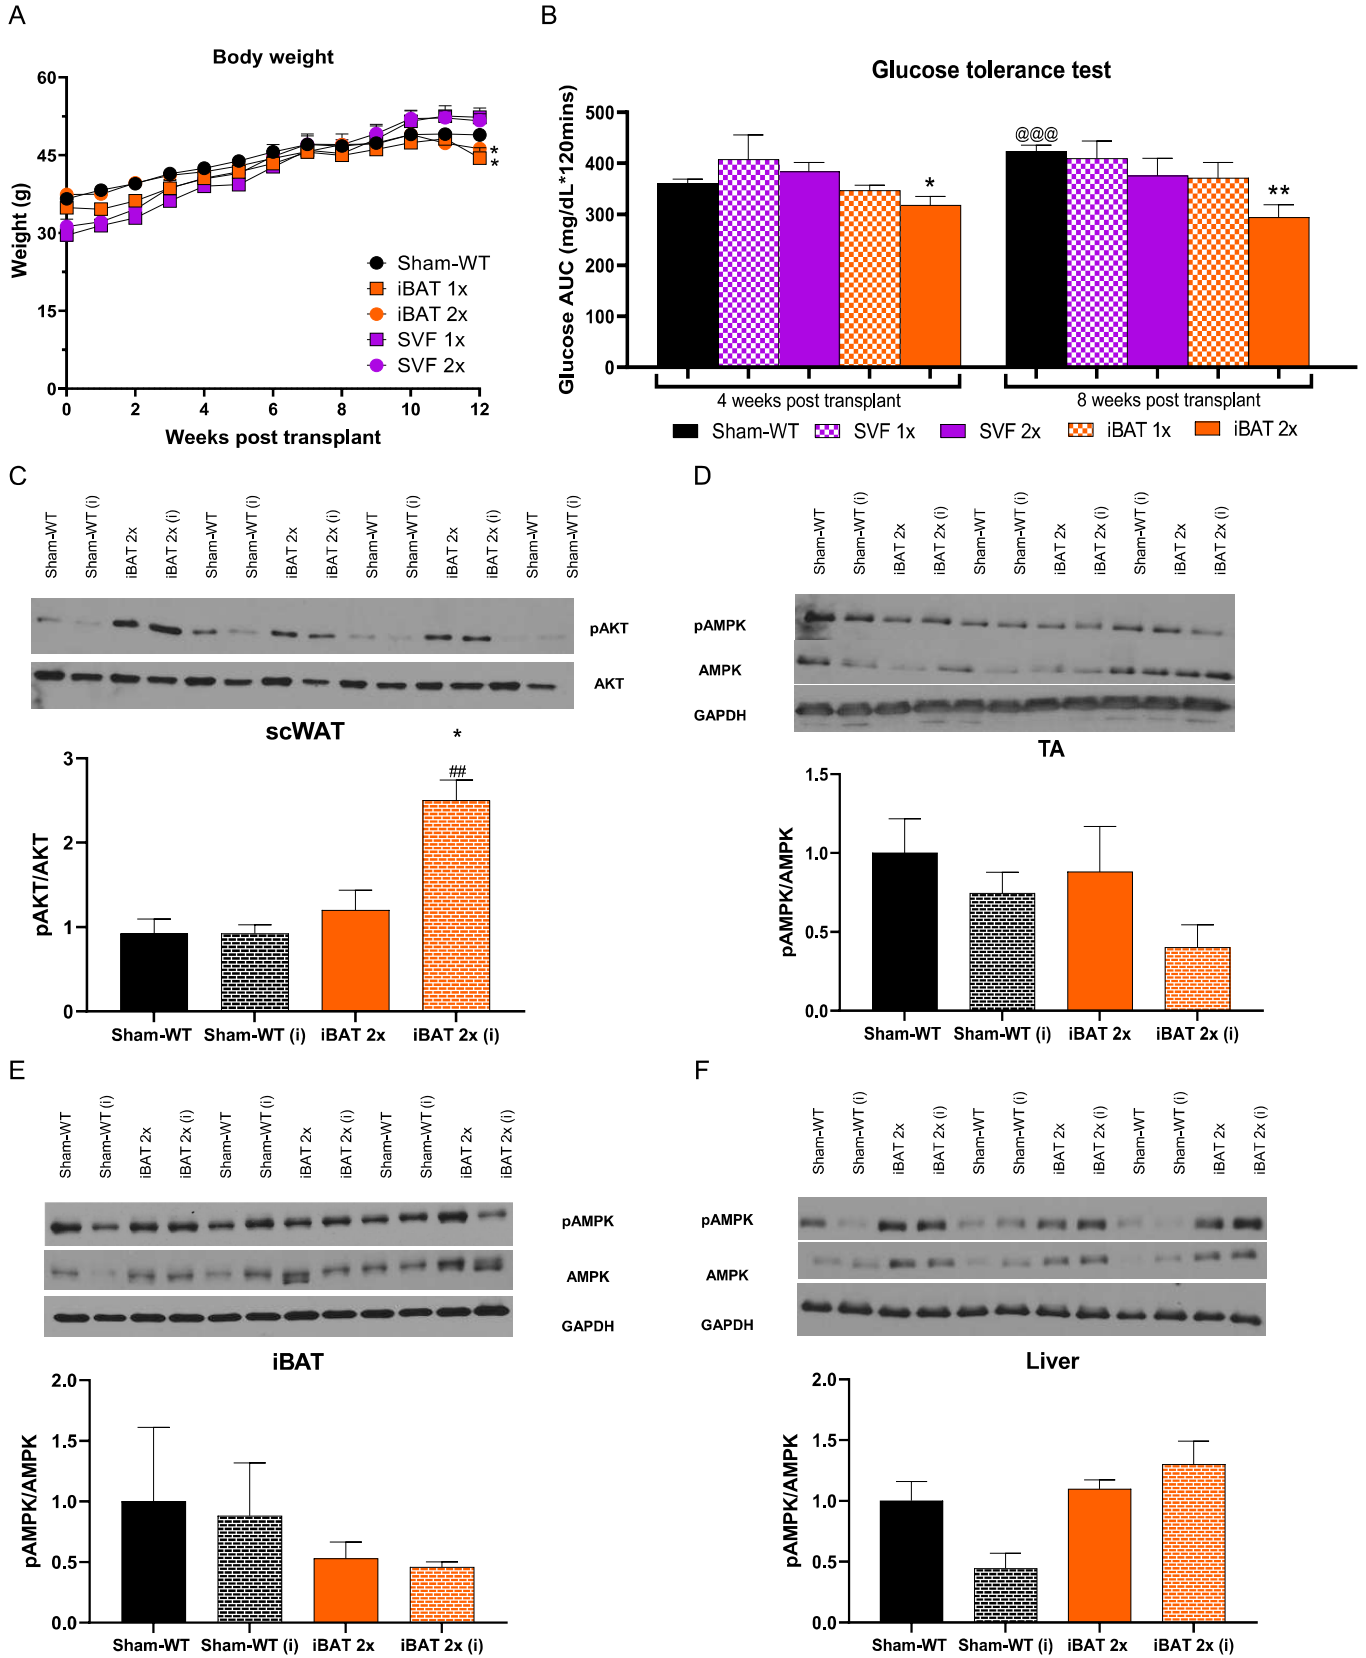

**Figure S3: Transplantation of committed pre-adipocytes from WT donors alters gene expression in WT recipients. Related to Figures 1-2.**

(A-E) Gene expression analysis of TA (A), Liver (B), iBAT (C), scWAT (D) and pgWAT (E), in Sham-WT and iBAT 2x mice, 12 weeks post-transplant (n=3-9 per group; \*p<0.05, \*\*p<0.01, \*\*\*p<0.001, \*\*\*\*p<0.0001 vs Sham-WT; two-tailed t-test). All data are represented as mean  $\pm$  SEM.

# Figure S3

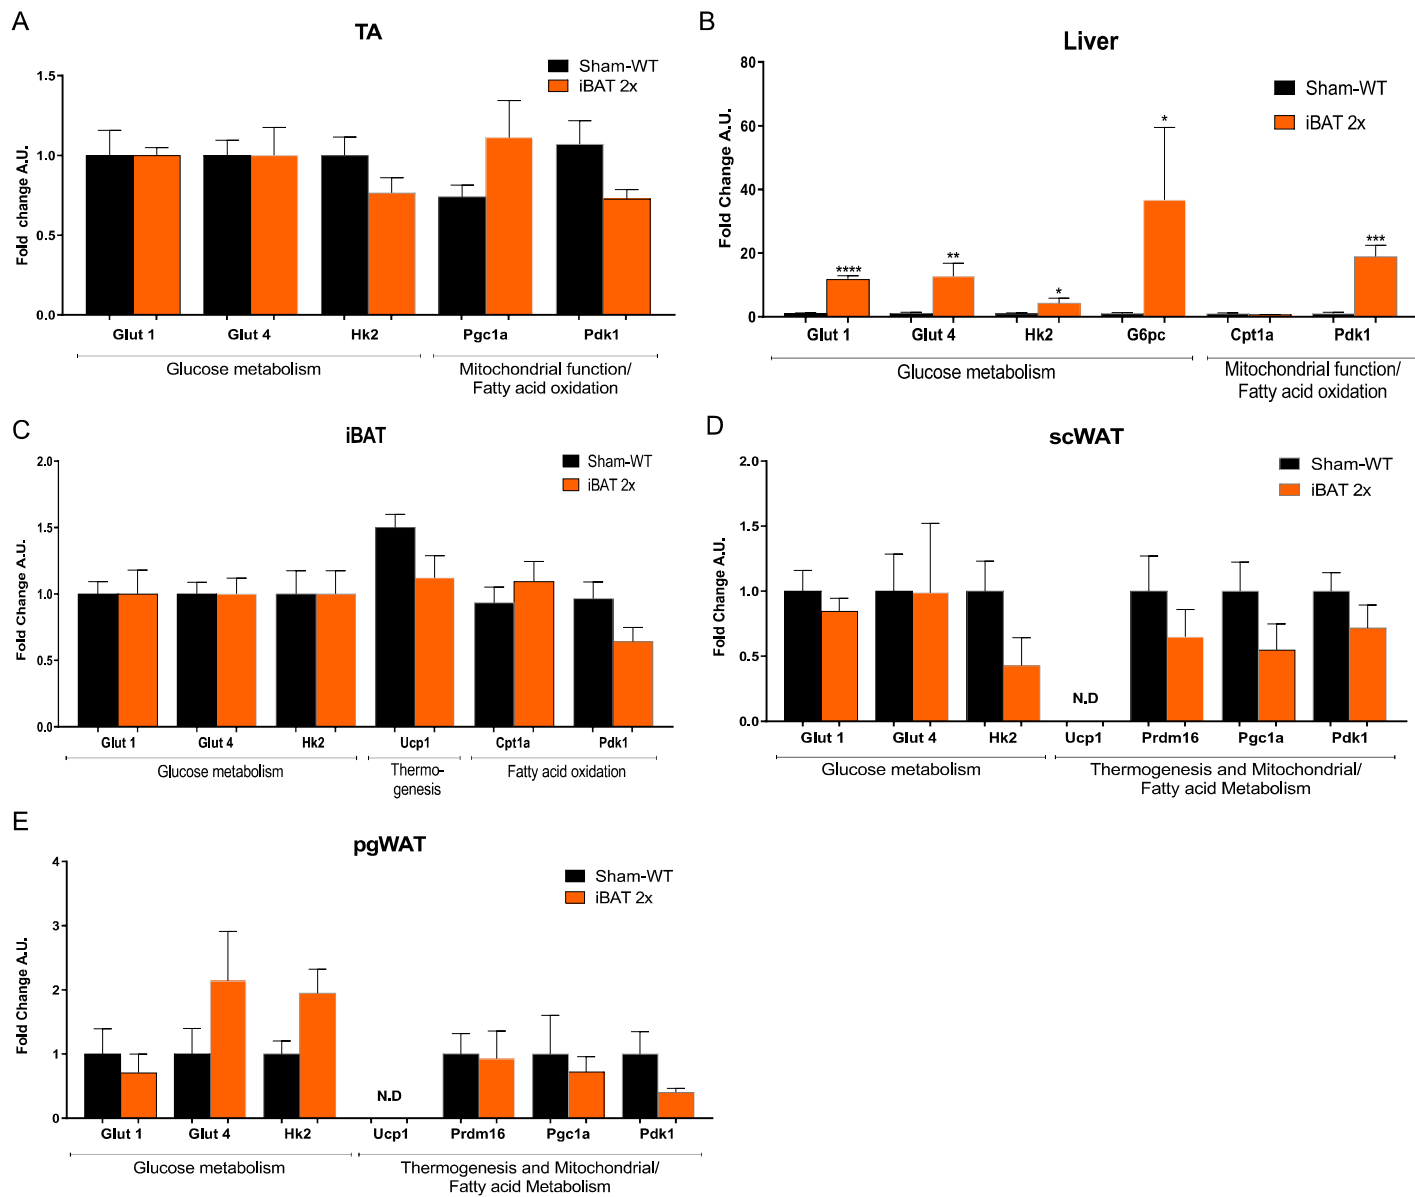

**Figure S4: Transplantation of WT committed pre-adipocytes alters pathways associated with glucose, insulin, and lipid metabolism in livers of WT recipient mice. Related to Figure 3.**

(A) Heat-map showing top 75 differentially expressed genes (DEGs) in iBAT 2x mice compared to Sham-WT mice. (n=7-9 per group; significance threshold: 1-fold-change,  $p < 0.01$ ). Color scale indicates scaled  $\log_2$  normalized expression. (B, C) Significantly upregulated (B) or downregulated (C) Gene ontology (GO) biological process (BP) terms based on the Over-Representation Analysis of iBAT 2x livers versus Sham-WT livers (n=7-9 per group). All data are represented as mean  $\pm$  SEM.



# Figure S4

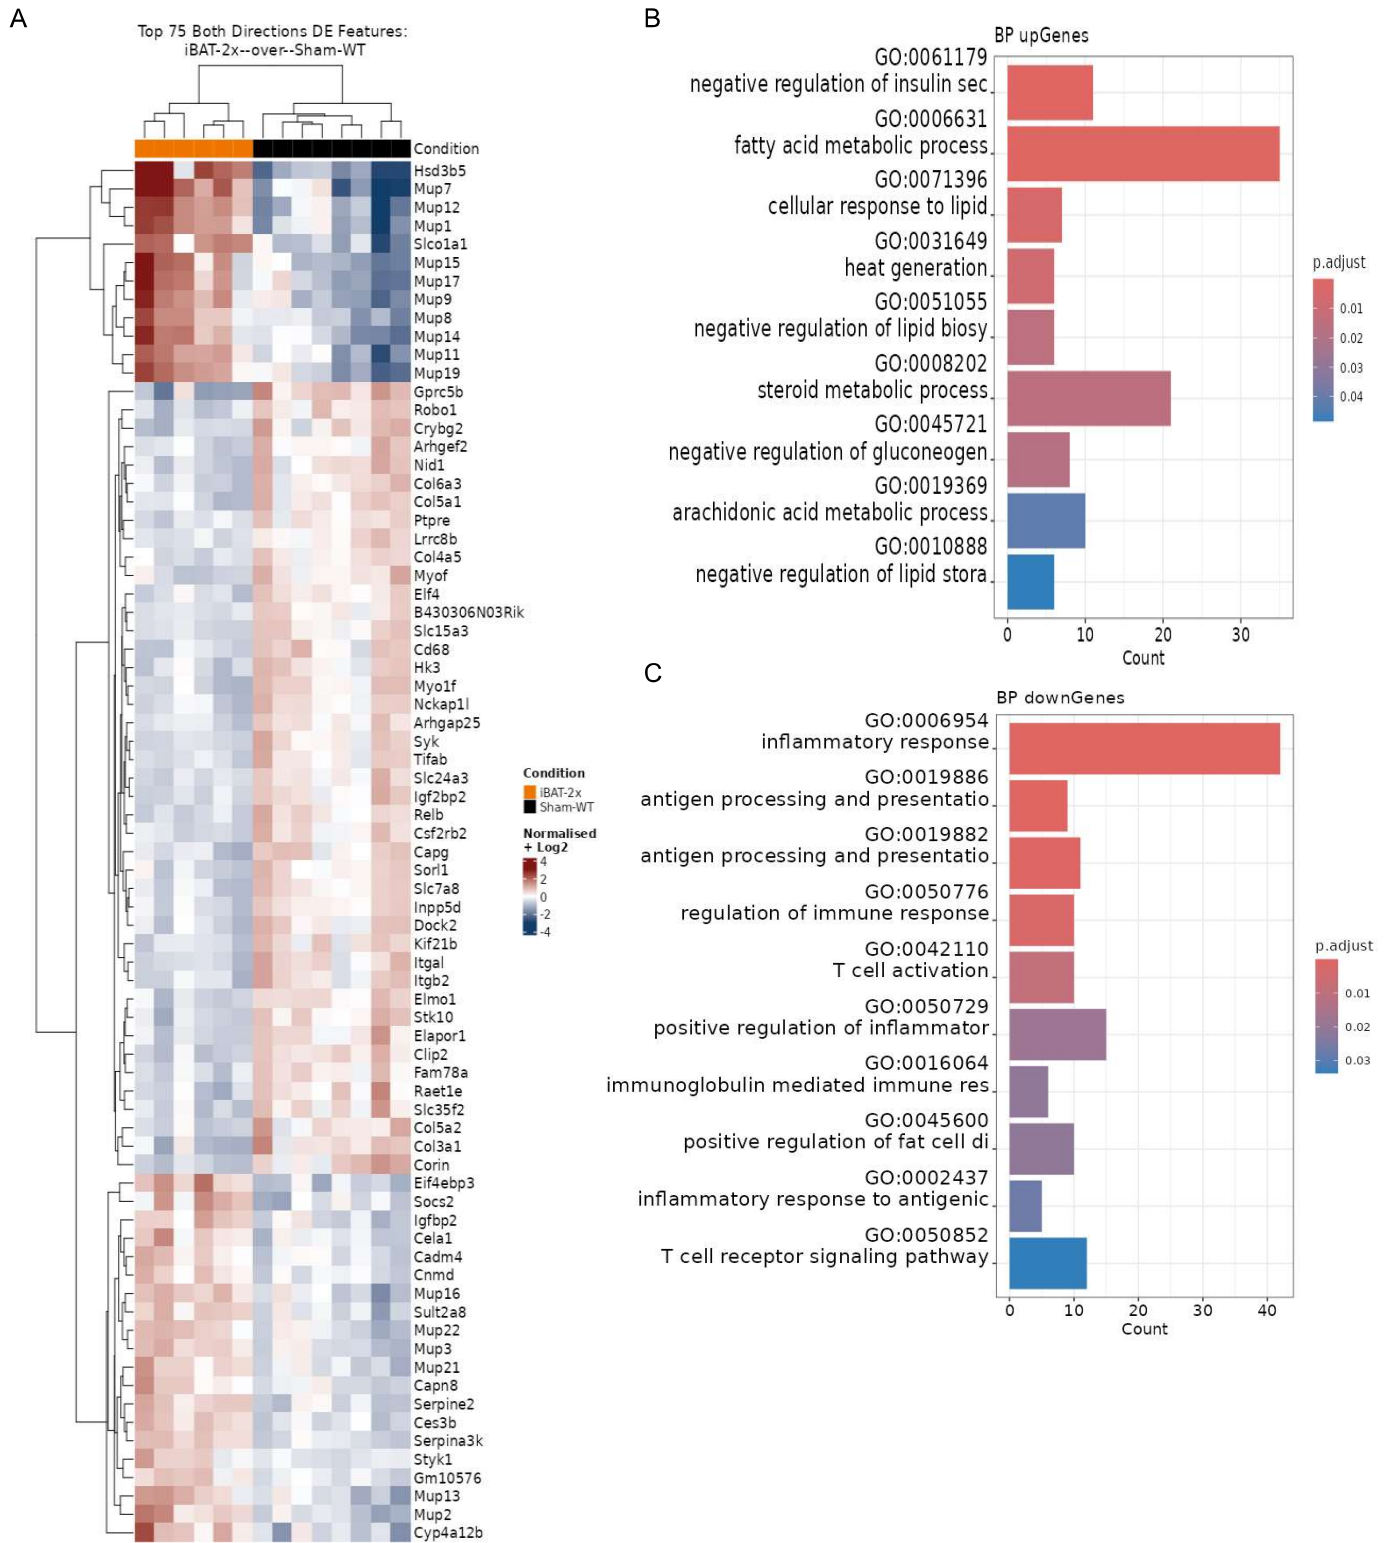

**Figure S5: Transplantation of WT committed pre-adipocytes affects protein expression and plasma FGF21 in WT recipient mice. Related to Figure 3.**

(A-C) Western blotting protein blots (Sham-WT and iBAT 2x groups) for MUP1 (A), MUP11 (B), and MUP12 (C) in the Liver, 12 weeks post-transplant (n=4-6 per group). (D, E) Plasma Adiponectin (ng/mL) (D) and Plasma FGF21 (ng/mL) (E) after 12-hour fast, 12 weeks post-transplant (n=3-12 per group). All data are represented as mean  $\pm$  SEM.

# Figure S5

A

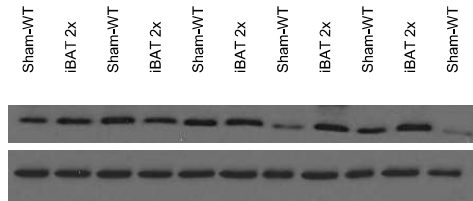

B

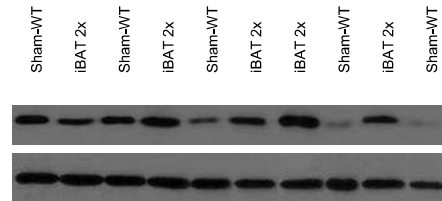

C

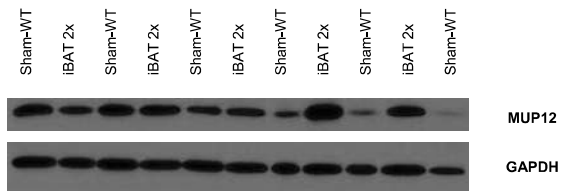

D

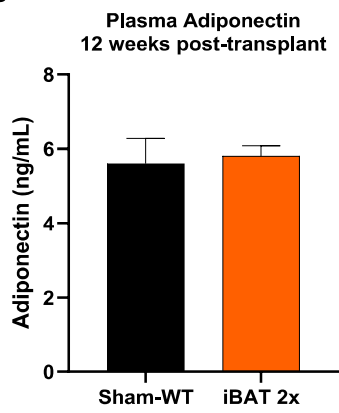

E

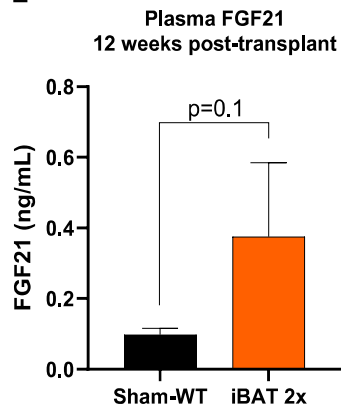

**Figure S6: Transplantation of committed pre-adipocytes from WT donors affects AKT but not AMPK signaling in FGF21<sup>-/-</sup> recipient mice. Related to Figures 4-5.**

(A) Western blotting protein expression for pAKT/AKT and blots for pAKT and AKT in scWAT. (B-E) Western blotting protein expression for pAMPK/AMPK and blots for pAMPK, AMPK and GAPDH in TA (B), iBAT (C), scWAT (D) and Liver (E). (F) Western blotting protein expression for pAKT/AKT in Sham-WT, Sham-KO and WT-to-KO recipients in TA (n=2-3 per group; insulin-stimulated conditions depicted using 'i'; \*p<0.05, \*\*p<0.01 as described [\*= insulin effect; #= group effect]; two-tailed t-test). All data are represented as mean  $\pm$  SEM.

# Figure S6

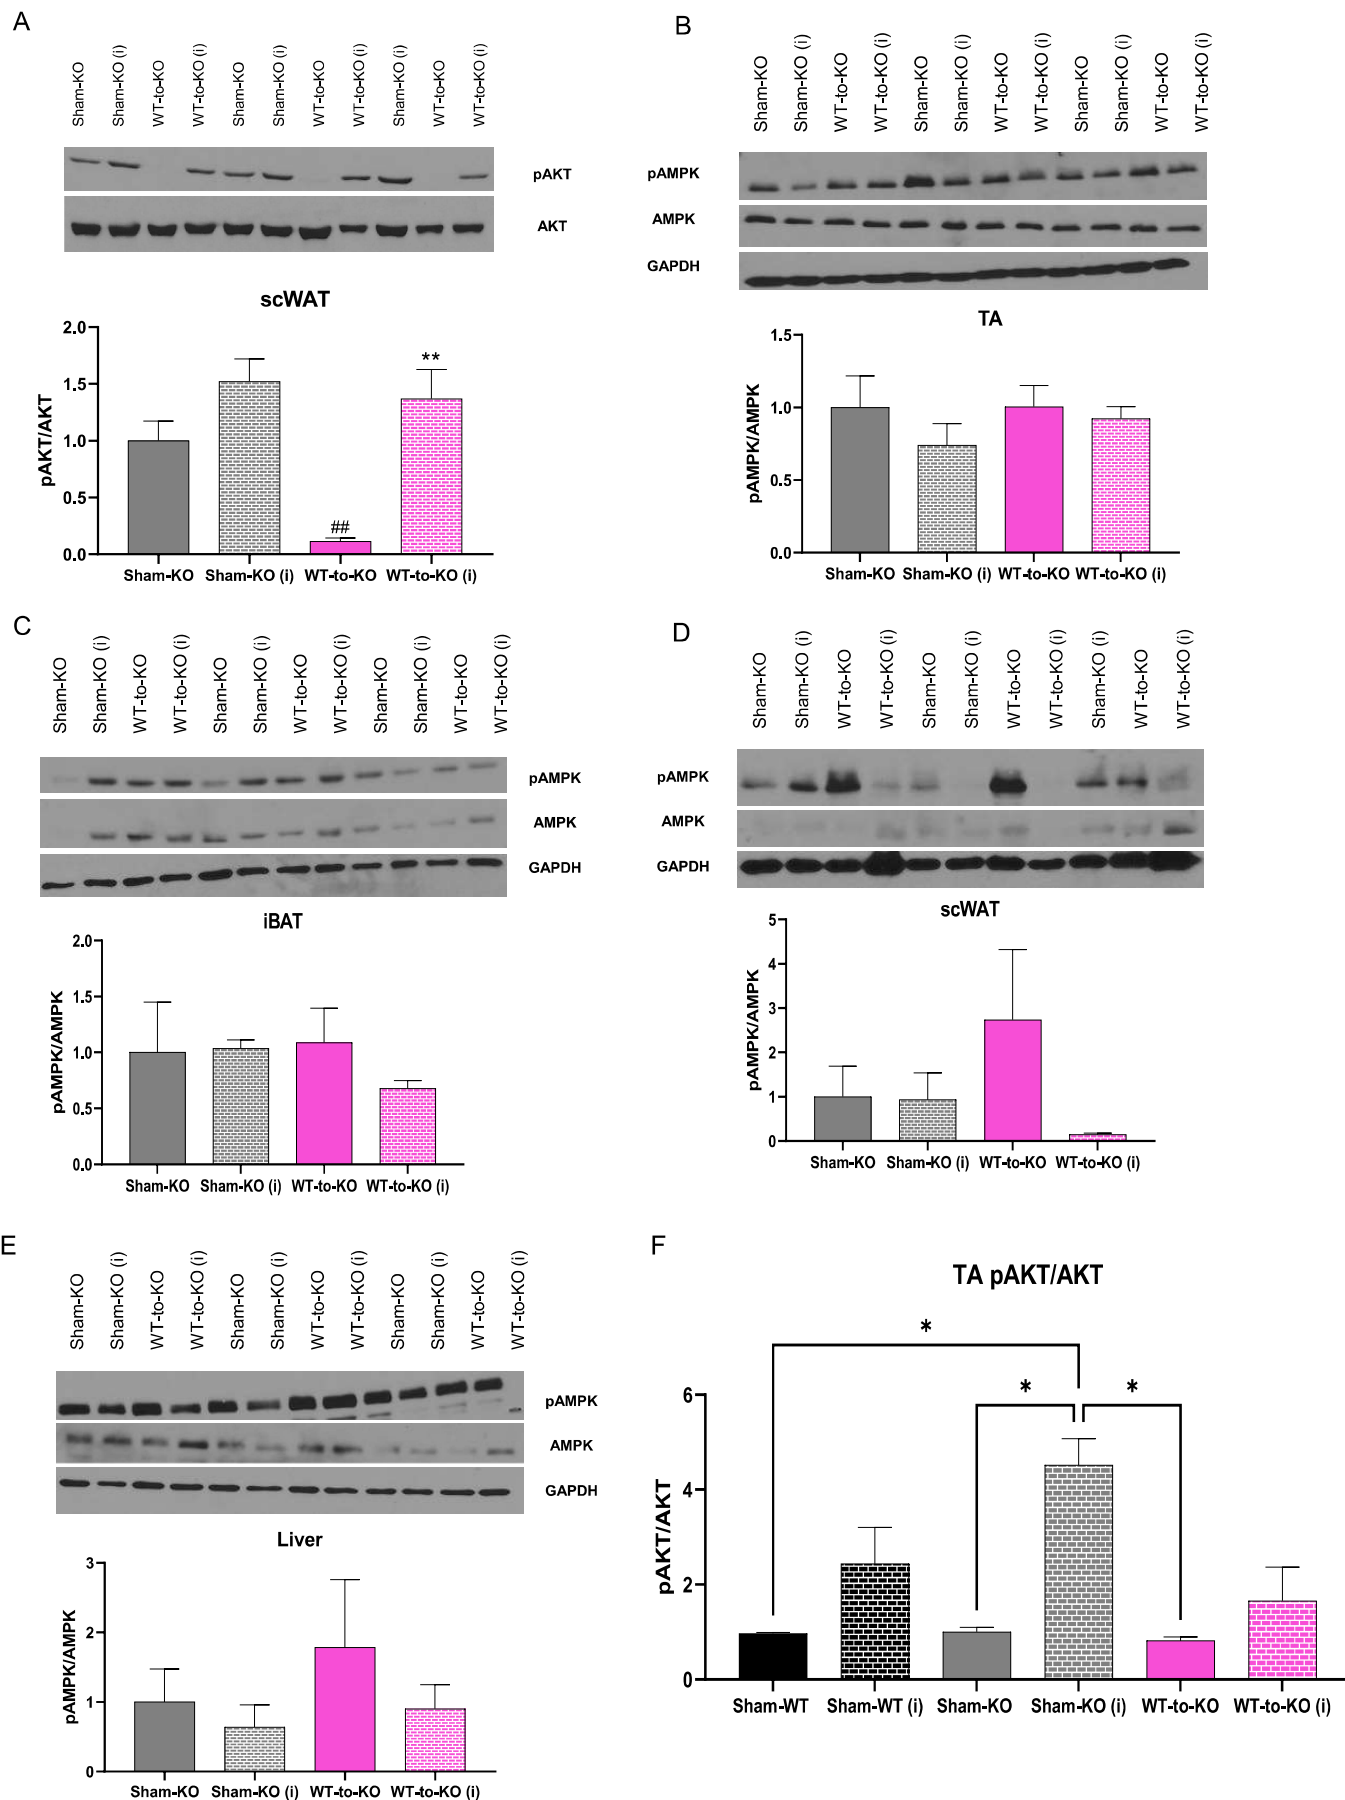

**Figure S7: Transplantation of committed pre-adipocytes from WT donors alters gene expression in the liver of FGF21<sup>-/-</sup> recipient mice. Related to Figures 4-5.**

(A-B) Gene expression analysis in Liver (A) and pgWAT (B) in Sham-KO and WT-to-KO mice, 12 weeks post-transplant (n=3-6 per group; \*\*p<0.01 vs Sham-KO; two-tailed t-test). (C-E) Western blotting protein blots (Sham-KO and WT-to-KO groups) for MUP1 (C), MUP11 (D), and MUP12 (E) in the Liver (n=4-6 per group). All data are represented as mean  $\pm$  SEM.

# Figure S7

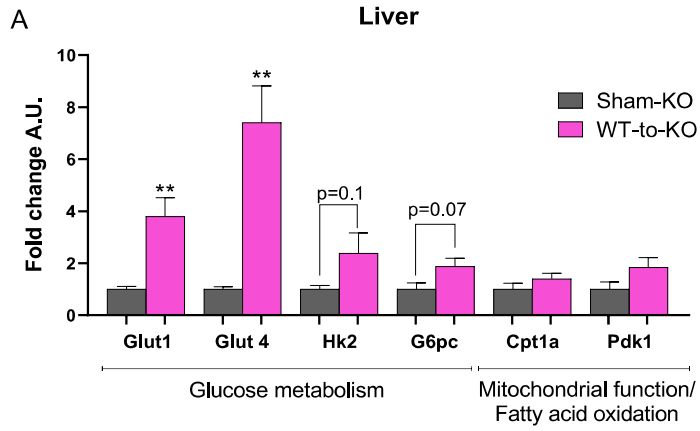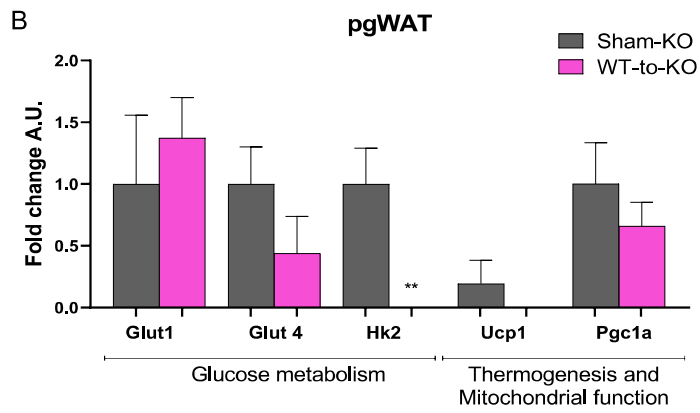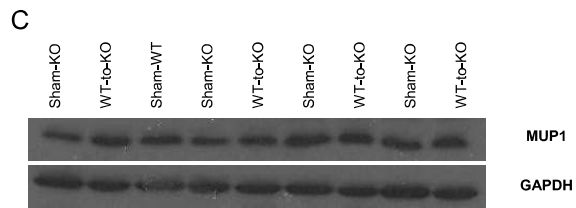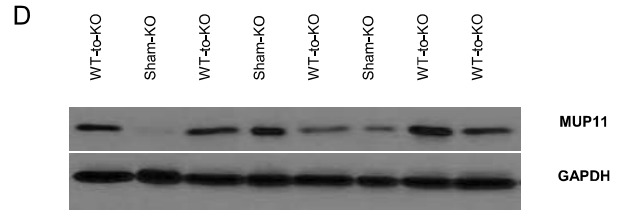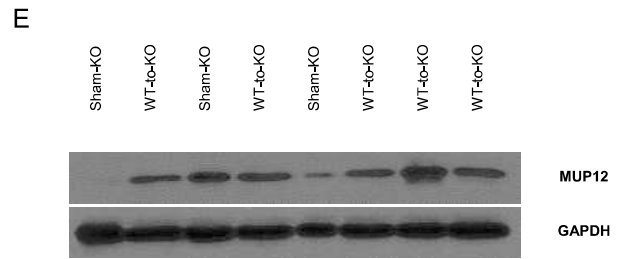

**Figure S8: Transplantation of committed pre-adipocytes from FGF21<sup>-/-</sup> donors affects AKT but not AMPK signaling in WT recipient mice. Related to Figures 6-7.**

(A) Western blotting protein expression for pAKT/AKT and blots for pAKT and AKT in scWAT. (B-E) Western blotting protein expression for pAMPK/AMPK and blots for pAMPK, AMPK and GAPDH in TA (B), iBAT (C), scWAT (D) and Liver (E). (n=2-3 per group; insulin-stimulated conditions depicted using 'i'; \*p<0.05, \*\*p<0.01 as described [\*= insulin effect; #= group effect]; two-tailed t-test). All data are represented as mean  $\pm$  SEM.



# Figure S8

A

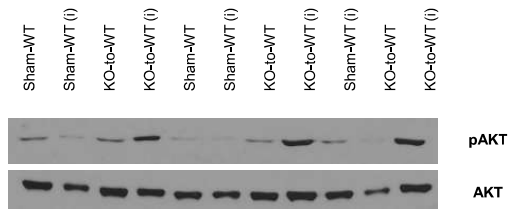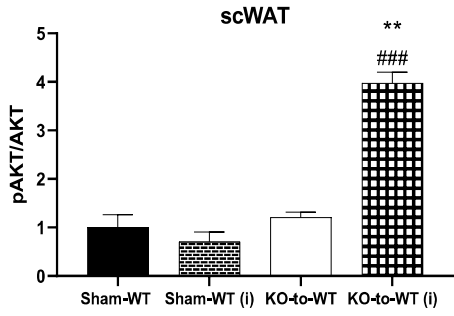

B

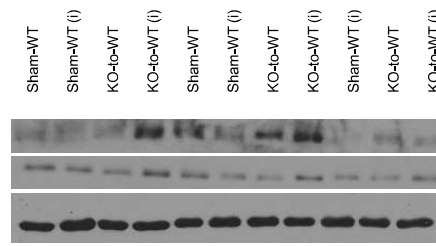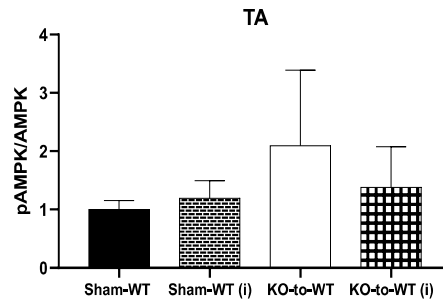

C

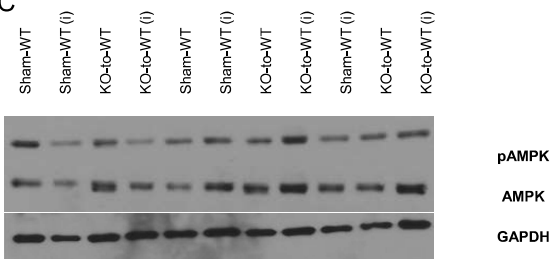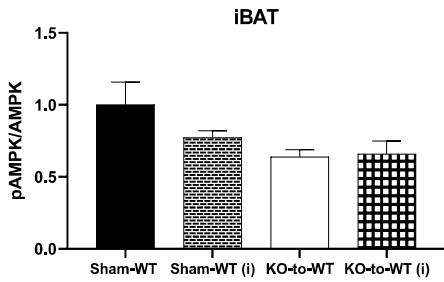

D

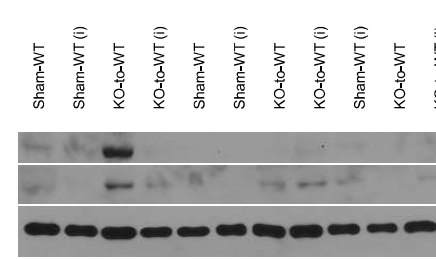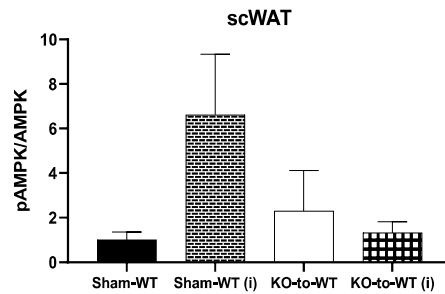

E

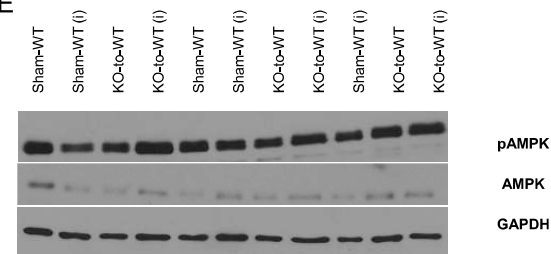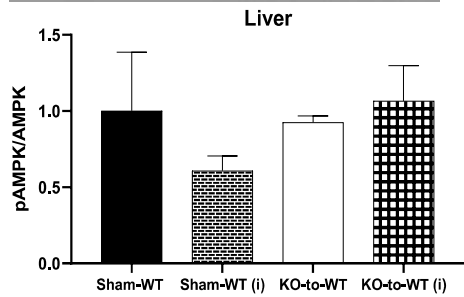

**Figure S9: Transplantation of committed pre-adipocytes from FGF21<sup>-/-</sup> donors affects AKT but not AMPK signaling in FGF21<sup>-/-</sup> recipient mice. Related to Figures 6-7.**

(A) Protein expression for pAKT/AKT and blots for pAKT and AKT in scWAT. (B-E) Western blotting protein expression for pAMPK/AMPK and blots for pAMPK, AMPK and GAPDH (B) TA, (C) iBAT, (D) scWAT and (E) Liver. (F) Western blotting protein expression for pAKT/AKT in Sham-WT, Sham-KO and KO-to-KO recipients in Liver (n=2-3 per group; insulin-stimulated conditions depicted using 'i'; \*p<0.05, \*\*p<0.01 as described [\*= insulin effect; #= group effect]; two-tailed t-test). All data are represented as mean ± SEM.

# Figure S9

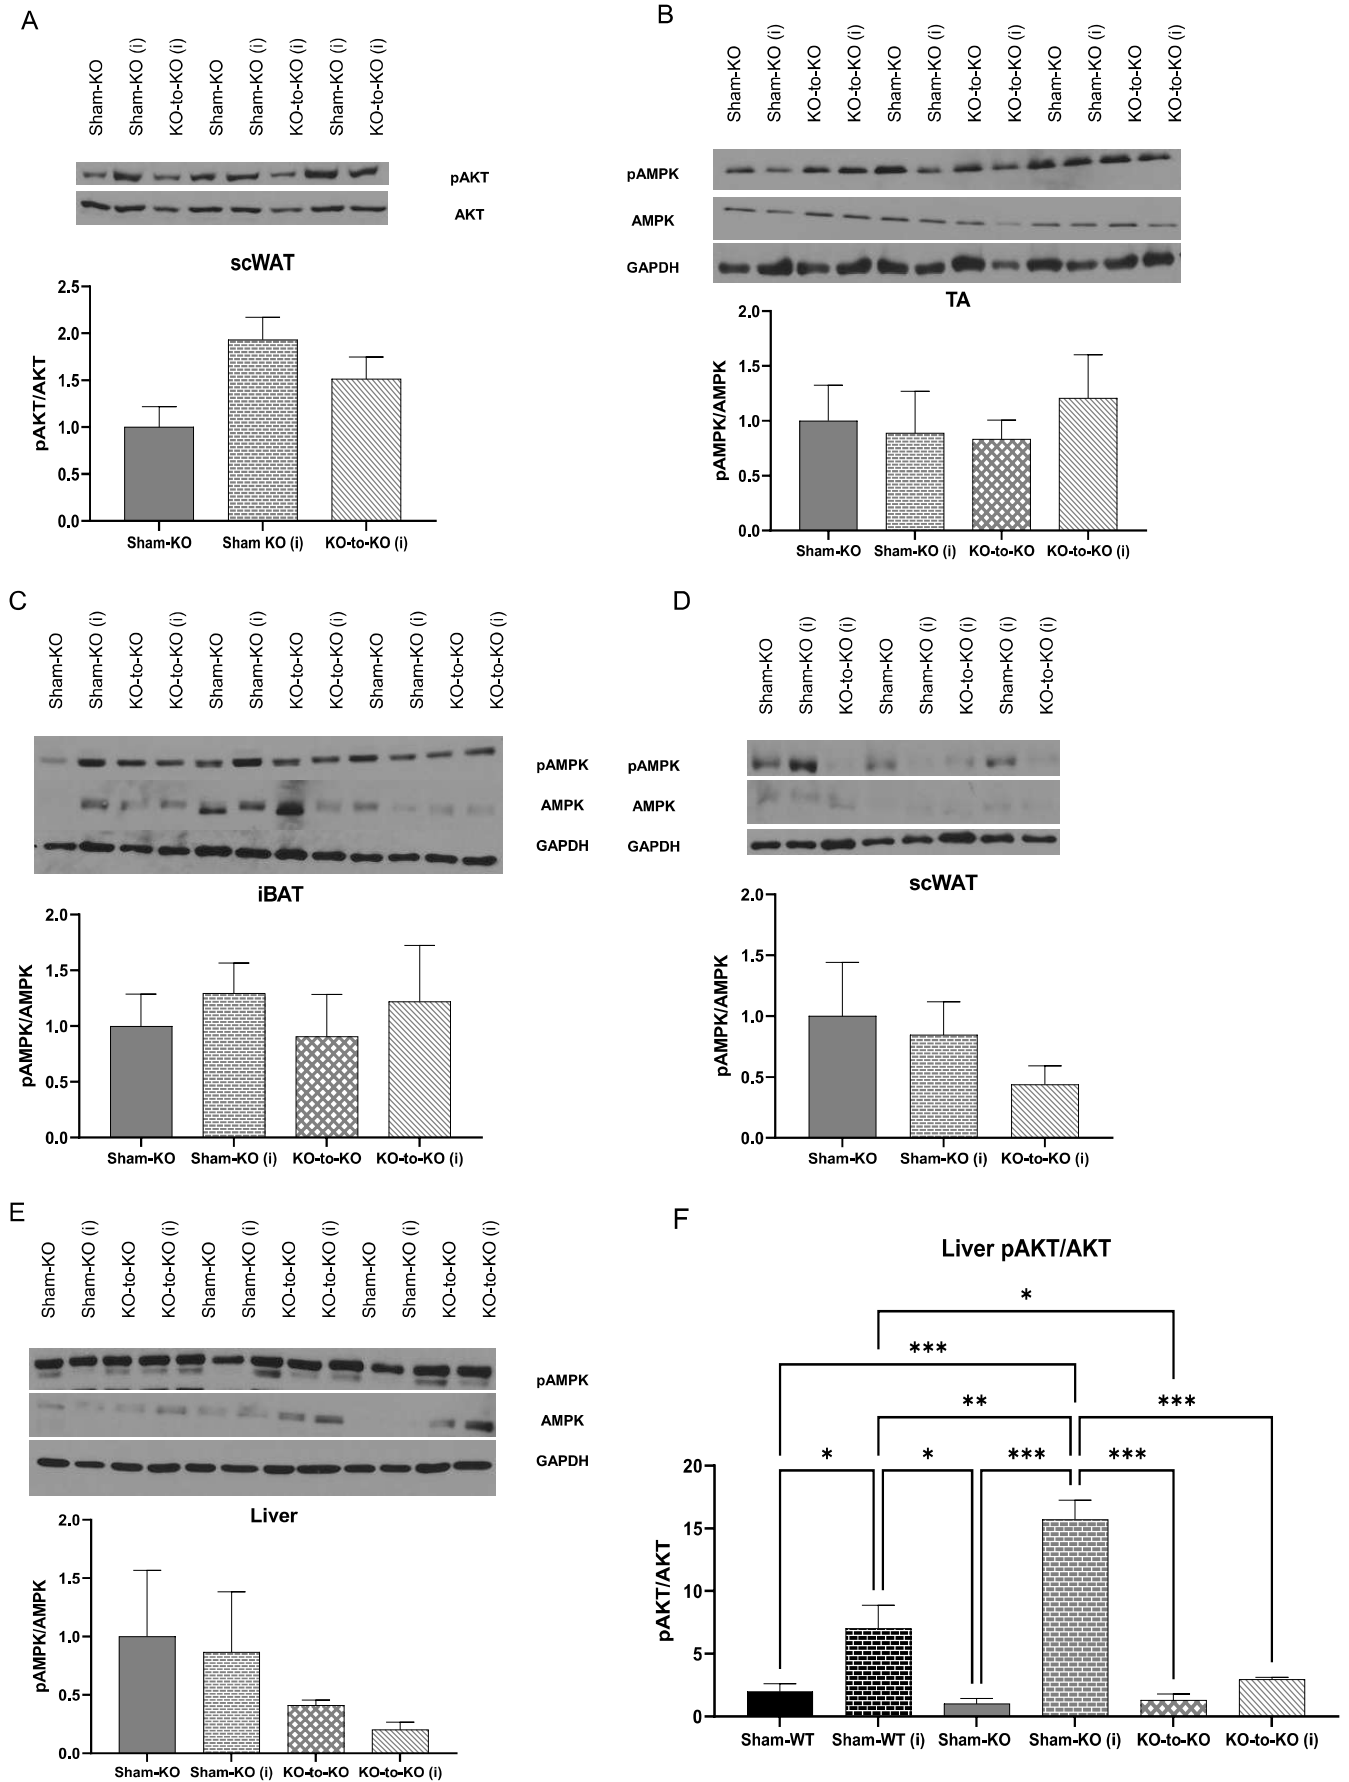

**Figure S10: Transplantation of committed pre-adipocytes from FGF21<sup>-/-</sup> donors alters gene expression in the liver of WT and FGF21<sup>-/-</sup> recipient mice. Related to Figures 6-7.**

(A, B) Gene expression analysis in Liver (A) and pgWAT (B) in Sham-WT and KO-to-WT mice, 12 weeks post-transplant (n=3-6 per group; \*p<0.05, \*\*p<0.01, \*\*\*p<0.001 vs Sham-WT; two-tailed t-test). (C, D) Gene expression analysis in Liver (C) and pgWAT (D) in Sham-KO and KO-to-KO mice, 12 weeks post-transplant (n=3-6 per group; \*p<0.05, \*\*p<0.01 vs Sham-KO; two-tailed t-test). (E, F) Gene (E) and protein (F) expression analysis in Liver of Sham-WT and KO-to-WT mice, 12 weeks post-transplant (n= 2-5 per group). (G, H) Gene (G) and protein (H) expression analysis in Liver of Sham-KO and KO-to-KO (F) mice, 12 weeks post-transplant (n=2-6 per group). All data are represented as mean ± SEM.

# Figure S10

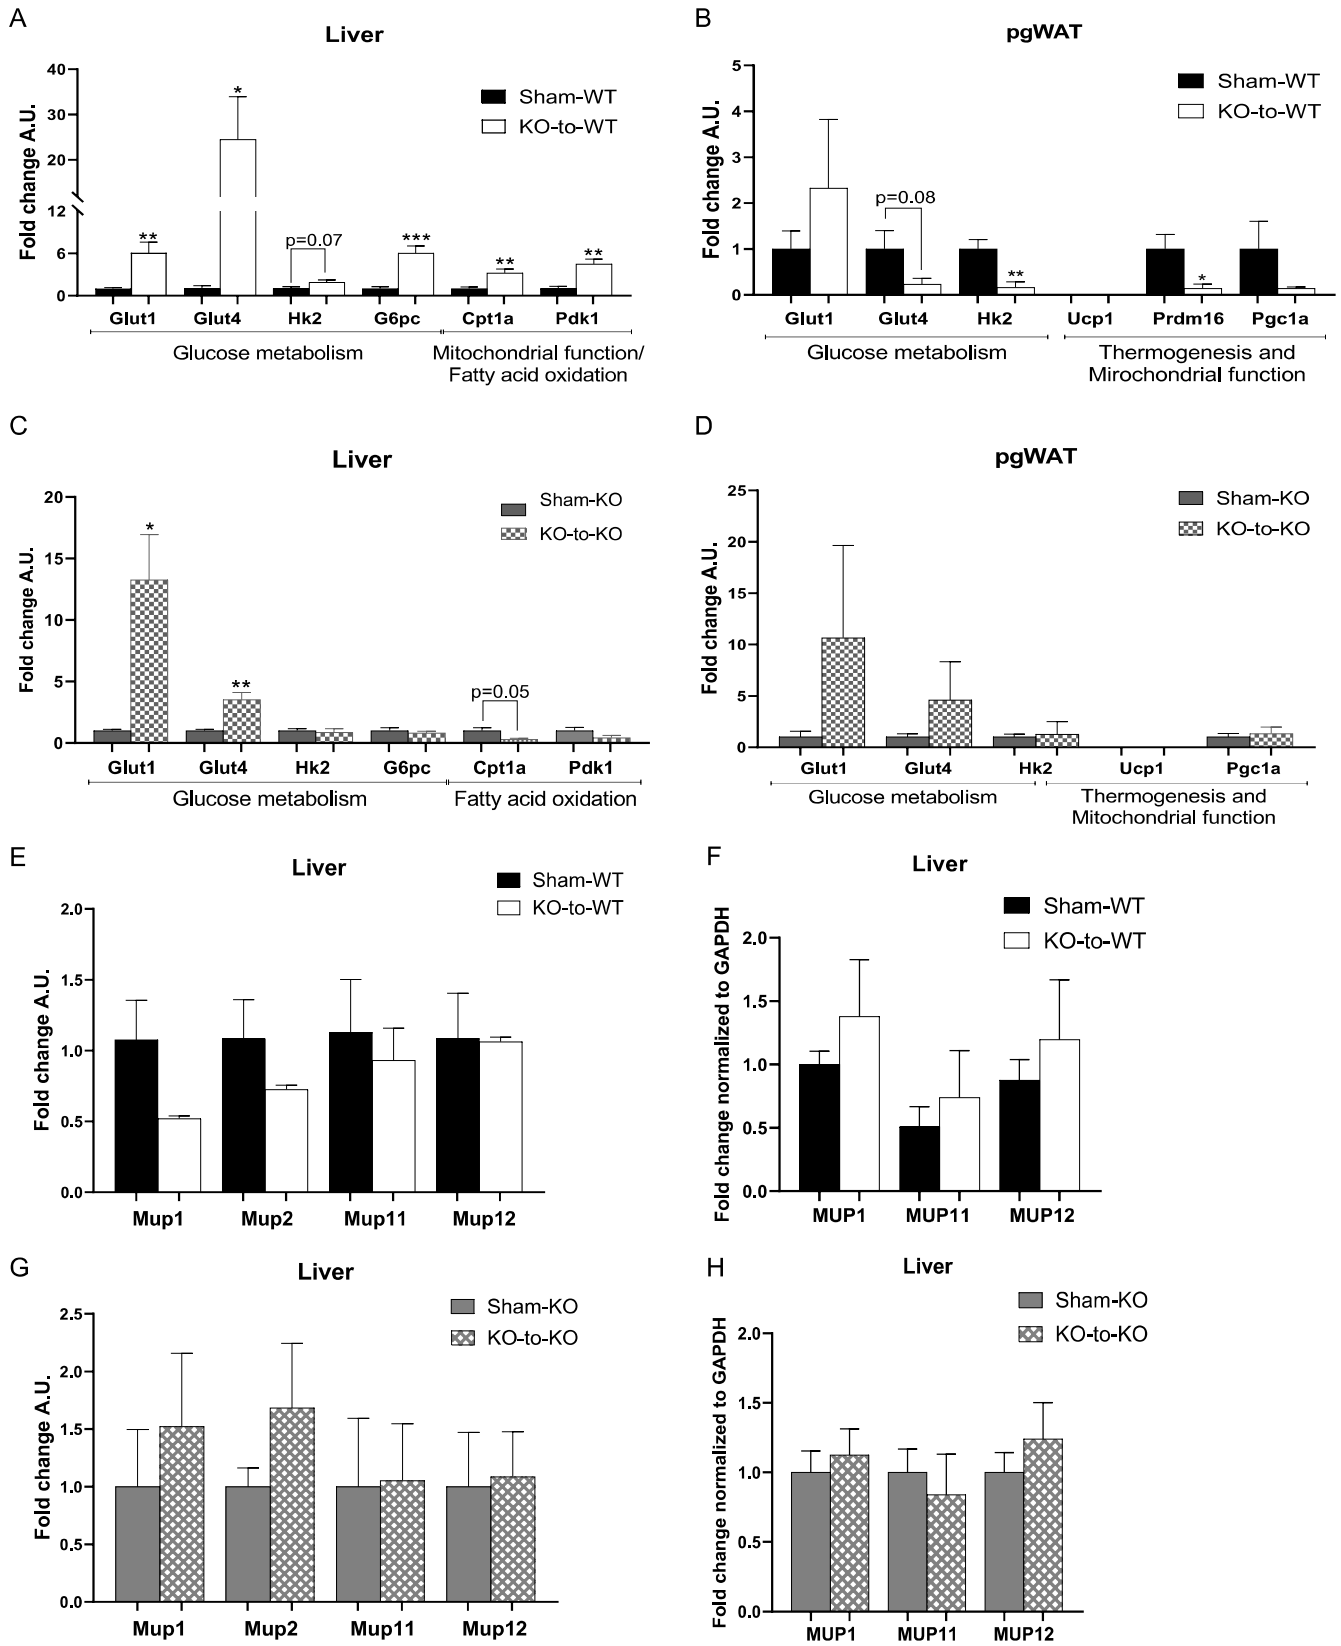

**Figure S11: Transplantation of committed pre-adipocytes from FGF21<sup>-/-</sup> donors does not affect MUP protein expression in the liver of WT and FGF21<sup>-/-</sup> recipient mice. Related to Figures 6-7.**

(A-C) Western blotting protein blots (Sham-WT and KO-to-WT groups) for MUP1 (A), MUP11 (B), and MUP12 (C) in the Liver (n=2-6 per group). (D-F) Western blotting protein blots (Sham-KO and KO-to-KO groups) for MUP1 (D), MUP11 (E), and MUP12 (F) in the Liver (n=2-6 per group). All data are represented as mean  $\pm$  SEM.

# Figure S11

A

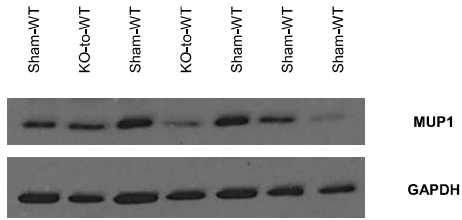

B

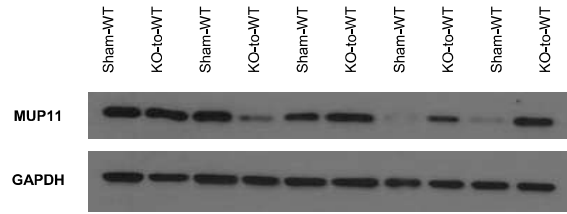

C

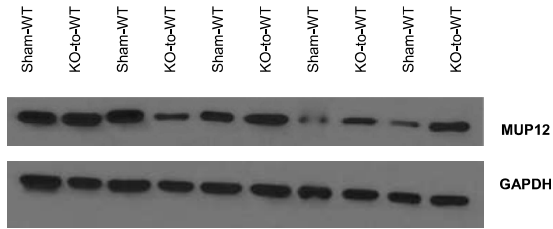

D

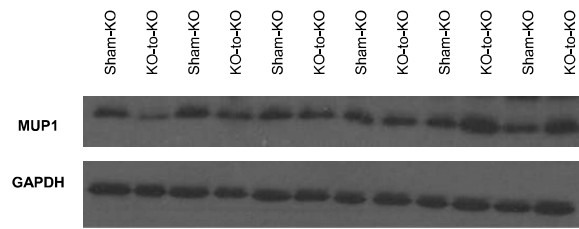

E

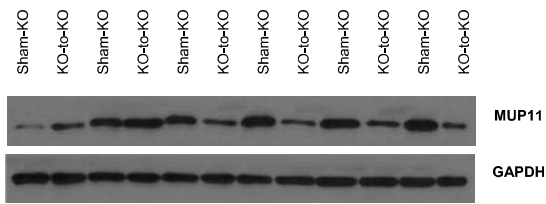

F

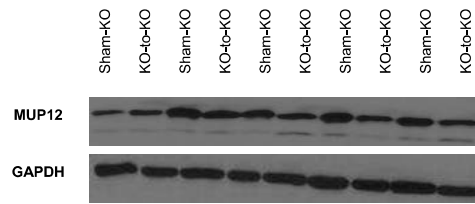

**Figure S12: Adipogenic differentiation of human brown adipocytes from AgeX-NP88 cell line and tracing of transplanted hBAs. Related to Figure 8.**

(A) 40x magnification of pre-adipocytes from BAT SVF showing the cells over days 3 and 8 of differentiation. (B) Expression of genes involved in adipogenesis in differentiating brown adipocytes over days 0, 1, 3, 5, 7 and 10 of differentiation (n=3 per group; \*p<0.05, \*\*p<0.01, \*\*\*p<0.001, \*\*\*\*p<0.001 vs Day 0 of differentiation). (C-H) Gene expression analysis in TA (C), Liver (D, E), iBAT (F), scWAT (G) and pgWAT (H) in Sham, HBA 2x and HBA 4x mice, 20 weeks post-transplant (n=4-5 per group; \*p<0.05, \*\*p<0.01, \*\*\*p<0.001 vs Sham; two-tailed t-test). All data are represented as mean  $\pm$  SEM.



# Figure S12

A

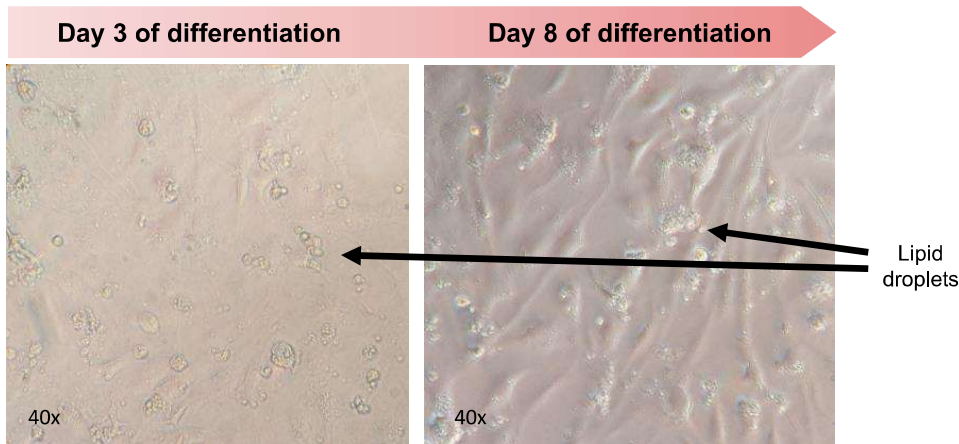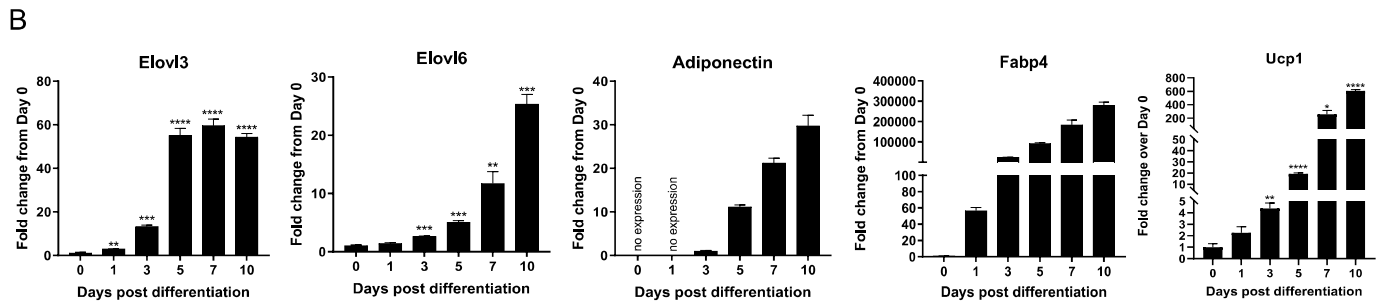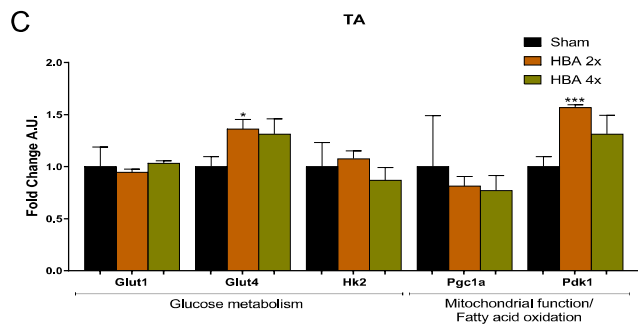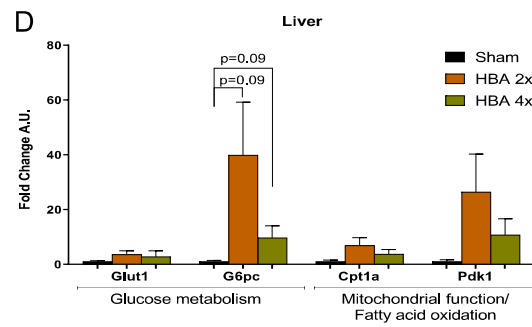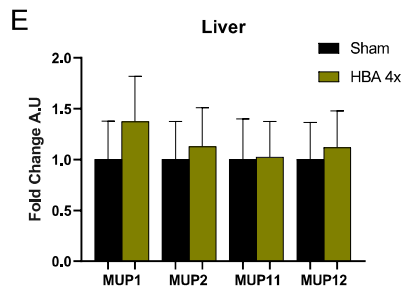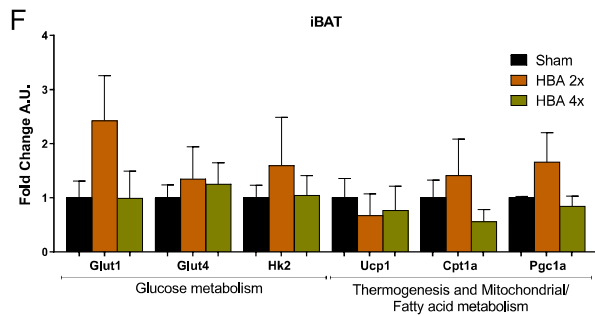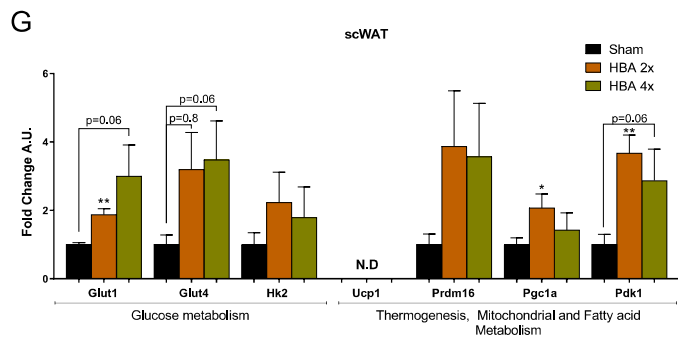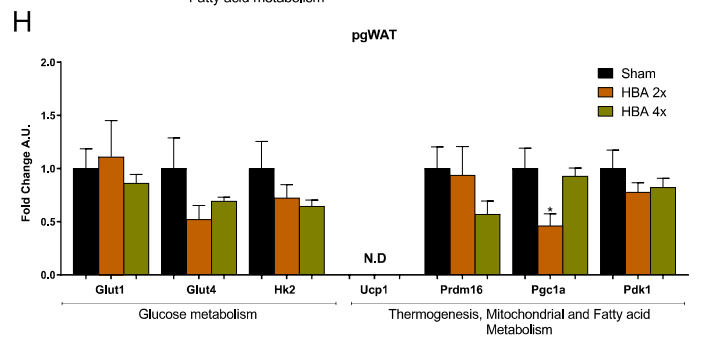

**Table S1. qPCR forward and reverse primer sequences for the genes measured. Related to Figures S1 and S12.**

| <b>Mouse Primers</b> |                          |                         |
|----------------------|--------------------------|-------------------------|
| <b>Gene</b>          | <b>Forward Sequence</b>  | <b>Reverse Sequence</b> |
| <i>Adipoq</i>        | AGATGGCACTCCTGGAGAGAAG   | ACATAAGCGGCTTCTCCAGGCT  |
| <i>Pparg</i>         | GTACTGTTCGGTTTCAGAAGTGCC | ATCTCCGCCAACAGCTTCTCCT  |
| <i>Ppara</i>         | ACCACTACGGAGTTCACGCATG   | GAATCTTGCAGCTCCGATCACAC |
| <i>Glut 4</i>        | ATCATCCGGAACCTGGAGG      | CGGTCAGGCGCTTTAGACTC    |
| <i>Glut 1</i>        | GCTTCTCCAACCTGGACCTCAAAC | ACGAGGAGCACCGTGAAGATGA  |
| <i>Hk2</i>           | AGAGAACAAGGGCGAGGAG      | GGAAGCGGACATCACAATC     |
| <i>G6pc</i>          | AGGTCGTGGCTGGAGTCTTGTC   | GTAGCAGGTAGAATCCAAGCGC  |
| <i>Prdm16</i>        | ATCCACAGCACGGGTGAAGCCAT  | ACATCTGCCACAGTCCTTGCA   |
| <i>Ucp1</i>          | AGGCTTCCAGTACCATTAGGT    | CTGAGTGAGGCAAAGCTGATTT  |
| <i>Pgc1a</i>         | GAATCAAGCCACTACAGACACCG  | CATCCCTCTTGAGCCTTTCTGTG |
| <i>Cpt1a</i>         | AAAGATCAATCGGACCCTAGACA  | CAGCGAGTAGCGCATAGTCA    |
| <i>Pdk1</i>          | GGCGGCTTTGTGATTTGTAT     | ACCTGAATCGGGGATAAAC     |
| <i>Mup1</i>          | ATGAAGCTGCTGCTGTGT       | TCATTCTCGGGCCTTGAG      |

|                      |                         |                                                                               |
|----------------------|-------------------------|-------------------------------------------------------------------------------|
| <i>Mup2</i>          | ATGAAGCTGCTGCTGCTGT     | TCATTCTCGGGCCTGGAG                                                            |
| <i>Mup11</i>         | ATGAAGATGCTGTTGCTG      | TCATTCTCGGGCCTGGAG                                                            |
| <i>Mup12</i>         | ATGAAGATGCTGCTGCTG      | TCATTCTCGGGCCTGGAG<br>(Same for <i>Mup2</i> , <i>Mup11</i> and <i>Mup12</i> ) |
| <i>Beta-actin</i>    | CATTGCTGACAGGATGCAGAAGG | TGCTGGAAGGTGGACAGTGAGG                                                        |
| <b>Human Primers</b> |                         |                                                                               |
| <b>Gene</b>          | <b>Forward Sequence</b> | <b>Reverse Sequence</b>                                                       |
| <i>Elovl3</i>        | CCACACCACGATGGAACACT    | CCTTGGGCCTGATGTAGGTC                                                          |
| <i>Elovl6</i>        | AAGCAGACAGGAGAACACTCG   | TAGGTGCCGACCACCGAATA                                                          |
| <i>Adipoq</i>        | GGCCATCTCCTCCTCACTTC    | ATCCTGCCCTCTGGTATG                                                            |
| <i>Fabp4</i>         | GACCTGGACTGAAGTTCGCA    | ACTTGCTTGCTAAATCAGGGA                                                         |
| <i>Ucp1</i>          | AGGCGTGAAGAGCAAGGAAA    | CCCCATCTTCACTCAGAGACTG                                                        |

**Table S2. Donors, Recipients, Cell number transplanted, and Abbreviations used for different transplantation models. Related to Figures 1-8, Figures S2 - S12.**

| <b>Donor Mice</b>                                 | <b>Recipient mice</b> | <b>Cell number transplanted</b> | <b>ID/ Abbreviation used</b> |
|---------------------------------------------------|-----------------------|---------------------------------|------------------------------|
| WT (C57BL/6) BAT SVF                              | WT (C57BL/6)          | 1 million                       | SVF 1x                       |
| WT (C57BL/6) BAT SVF                              | WT (C57BL/6)          | 2 million                       | SVF 2x                       |
| WT (C57BL/6) BAT committed pre-adipocytes         | WT (C57BL/6)          | 1 million                       | iBAT 1x                      |
| WT (C57BL/6) BAT committed pre-adipocytes         | WT (C57BL/6)          | 2 million                       | iBAT 2x                      |
| WT (C57BL/6) BAT committed pre-adipocytes         | FGF21 <sup>-/-</sup>  | 2 million                       | WT-to-KO                     |
| FGF21 <sup>-/-</sup> BAT committed pre-adipocytes | WT (C57BL/6)          | 2 million                       | KO-to-WT                     |
| FGF21 <sup>-/-</sup> BAT committed pre-adipocytes | FGF21 <sup>-/-</sup>  | 2 million                       | KO-to-KO                     |
| N/A                                               | WT                    | Sham/ Empty Scaffolds           | Sham-WT                      |

|                     |                      |                       |         |
|---------------------|----------------------|-----------------------|---------|
| N/A                 | FGF21 <sup>-/-</sup> | Sham/ Empty Scaffolds | Sham-KO |
| N/A                 | NSG                  | Sham/Empty Scaffolds  | Sham    |
| AgeX-NP88 cell line | NSG                  | 2 million             | HBA 2x  |
| AgeX-NP88 cell line | NSG                  | 4 million             | HBA 4x  |
